# Supplementary material for: Asymmetric transfer hydrogenation reactions of N-sulfonylimines by using alcohols as hydrogen sources
Source: Royal Society of Chemistry journal article supplement (doi:10.1039/c8cc01284a), 2018-01-01
Supplement: c8cc01284a1.pdf [file c8cc01284a1.pdf]

## Supporting Information

# Asymmetric Transfer Hydrogenation Reactions of *N*-Sulfonylimines by Using Alcohols as Hydrogen Sources

Fan Yang,<sup>a</sup> Jingchao Chen,<sup>\*a</sup> Guoli Shen,<sup>a</sup> Xuexin Zhang,<sup>a</sup> and Baomin Fan<sup>\*ab</sup>

<sup>a</sup> YMU-HKBU Joint Laboratory of Traditional Natural Medicine, Yunnan Minzu University, Kunming, 650500, China. E-mail: chenjingchao84@163.com (J.-C. Chen); adams.bmf@hotmail.com (B.-M. Fan)

<sup>b</sup> Key Laboratory of Chemistry in Ethnic Medicinal Resources, Yunnan Minzu University, Kunming, 650500, China

### Table of Contents

|                                                 |            |
|-------------------------------------------------|------------|
| <b>A: General Information</b>                   | <b>S2</b>  |
| <b>B: Procedure for the Reactions</b>           | <b>S2</b>  |
| <b>C: Characterization Data of Products</b>     | <b>S2</b>  |
| <b>D: NMR Spectra of Products</b>               | <b>S9</b>  |
| <b>E: HPLC Spectra of Products</b>              | <b>S18</b> |
| <b>F: X-Ray Crystallography of Compound 3aa</b> | <b>S33</b> |

## A: General Information

The reactions and manipulations were performed under an atmosphere of argon by using standard Schlenk techniques and Drybox (Mikrouna, Supper 1220/750).  $^1\text{H}$  NMR and  $^{13}\text{C}$  NMR spectra were recorded on Bruker-Avance 400 MHz spectrometer.  $\text{CDCl}_3$  was used as solvent. Chemical shifts ( $\delta$ ) were reported in ppm with tetramethylsilane as internal standard, and  $J$  values were given in Hz. The enantioselective excesses were determined by Agilent 1260 Series HPLC using Daicel AD-H, AS-H, OJ-H and OD-H chiral columns eluted with a mixture of isopropyl alcohol and hexane. Melting points were measured on X-4 melting point apparatus and uncorrected. High resolution mass spectra (HRMS) were performed on a VG Autospec-3000 spectrometer. Column chromatography was performed with silica gel (200-300 mesh) with petroleum ether and ethyl acetate as eluents.

## B: Procedure for the reactions

**Typical procedure for the preparation of *N*-sulfonylimines<sup>[1]</sup>:** To a 50 mL Schlenk flask were charged with benzenesulfonamide (314 mg, 2.0 mmol), acetophenone (1.2 mL, 10 mmol) and  $\text{Ti}(\text{OEt})_4$  (1.7 mL, 8.0 mmol) in  $\text{CH}_2\text{Cl}_2$  (30 mL). The resulting solution was heated to reflux and monitored by TLC monitoring until complete consumption of benzenesulfonamide. Then  $\text{CH}_3\text{OH}$  (6 mL) and a few drops of  $\text{NaHCO}_3$  were added. The solution was filtered through anhydrous  $\text{Na}_2\text{SO}_4$  and washed with EtOAc. The solvent was removed under reduced pressure and the crude product was dissolved in 10 mL  $\text{CH}_2\text{Cl}_2$  followed by the addition of *m*-CPBA (0.7 mg, 3.0 mmol). After the completion of the reaction, the solution was washed with saturated solution of  $\text{NaHCO}_3$  and dried over anhydrous  $\text{Na}_2\text{SO}_4$ . The solvent was removed under reduced pressure and the crude product was purified by column chromatography using hexanes and EtOAc (10:1) to obtain the corresponding *N*-sulfonylimine **1a** in 66% yield. Compounds **1a-o** were prepared in similar methods.

**Typical procedure for the preparation of cyclic *N*-sulfonylimines<sup>[2]</sup>:** Saccharin (367 mg, 2.0 mmol) and THF (20 mL) were added to a Schlenk flask under argon atmosphere. Then phenylmagnesium bromide (4.4 mmol in THF 4.4 mL) was added dropwise at 25 °C. The resulting mixture was stirred overnight before quenching with a saturated aqueous  $\text{NH}_4\text{Cl}$  solution. The aqueous layer was extracted with  $\text{CH}_2\text{Cl}_2$  and combined organic layer was washed with brine and dried over  $\text{Na}_2\text{SO}_4$ . The solvent was removed under reduced pressure and the crude product was dissolved in toluene (30 mL), followed by the addition of TsOH (200 mg, 1.2 mmol). The resulting solution was heated to reflux for overnight. The solvent was removed and then a saturated aqueous  $\text{NH}_4\text{Cl}$  solution (20 mL) was added. The aqueous layer was extracted with  $\text{CH}_2\text{Cl}_2$ , and the organic extracts were dried over anhydrous  $\text{Na}_2\text{SO}_4$ . After concentration, the residue was finally purified by column chromatography using hexanes and EtOAc (2:1) to afford the cyclic imine **1m** in 93% yield. Compounds **1n** was prepared in similar methods.

**Typical procedure for the asymmetric transfer hydrogenation reaction of *N*-tosylimines:** Pd(OAc)<sub>2</sub> (2.3 mg, 0.01 mmol), (*R*)-Segphos (7.3 mg, 0.012 mmol) and 1.0 mL DCE were added to a Schlenk tube under argon atmosphere. The resulting mixture was stirred at room temperature for 30 min, then Zn(OTf)<sub>2</sub> (7.3 mg, 0.02 mmol) was added and stirred for additional 10 min, followed by the addition of 4 Å Molecular sieves (50.0 mg) and a solution of methanol (40 μL, 1 mmol) in DCE (1.0 mL), and the mixture was stirred for additional 10 min. After the addition of *N*-tosylimines **1a** (51.8 mg, 0.2mmol), a solution of trifluoromethanesulfonic acid (1μL) in DCE (0.1 mL) was added, the mixture was then stirred at 70 °C under argon atmosphere with TLC monitoring until complete consumption of **1a**. The reaction mixture was concentrated, and the residue residue was purified by chromatography on a silica gel column to afford the desired product **3aa** (48 mg, 93% yield).

### C: Characterization Data of Products

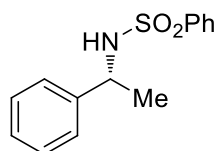

#### **(*R*)-*N*-(1-phenylethyl)benzenesulfonamide (**3aa**)**<sup>[3]</sup>

White solid, 93% yield, 98% *ee*. Mp 92-95 °C.  $[\alpha]_{\text{D}}^{20} = +70.6$  ( $c = 0.68$ , CH<sub>2</sub>Cl<sub>2</sub>). <sup>1</sup>H NMR (400 MHz, CDCl<sub>3</sub>): δ 7.72 (d,  $J = 7.2$  Hz, 2H), 7.46 (t,  $J = 7.2$  Hz, 1H), 7.35 (t,  $J = 7.6$  Hz, 2H), 7.16-7.14 (m, 3H), 7.09-7.07 (m, 2H), 5.41-5.34 (m, 1H), 4.52-4.45 (m, 1H), 1.42 (d,  $J = 6.8$  Hz, 3H). The *ee* of **3aa** was determined by HPLC analysis using two Daicel Chiralcel OJ-H columns (2 × 25 cm × 0.46 cm ID), conditions: *n*-hexane/*i*-PrOH = 70/30, 1.0 mL/min, 240 nm;  $t_{\text{minor}} = 12.5$  min,  $t_{\text{major}} = 18.3$  min.

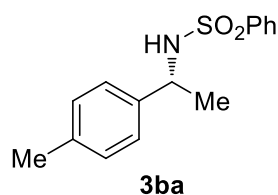

#### **(*R*)-*N*-(1-(*p*-tolyl)ethyl)benzenesulfonamide (**3ba**)**<sup>[3]</sup>

White solid, 85% yield, 97% *ee*. Mp 143-145 °C.  $[\alpha]_{\text{D}}^{20} = +87.1$  ( $c = 0.76$ , CH<sub>2</sub>Cl<sub>2</sub>). <sup>1</sup>H NMR (400 MHz, CDCl<sub>3</sub>): δ 7.74-7.72 (m, 2H), 7.51-7.47 (m, 1H), 7.414-7.37 (m, 2H), 7.00-6.95 (m, 4H), 4.97 (d,  $J = 7.2$  Hz, 2H), 4.48-4.41 (m, 1H), 2.27 (s, 3H), 1.42 (d,  $J = 6.8$  Hz, 3H). The *ee* of **3ba** was determined by HPLC analysis using Daicel Chiralcel OD-H column (25 cm × 0.46 cm ID), conditions: *n*-hexane/*i*-PrOH = 70/30, 0.5 mL/min, 240 nm;  $t_{\text{major}} = 10.4$  min,  $t_{\text{minor}} = 11.6$  min.

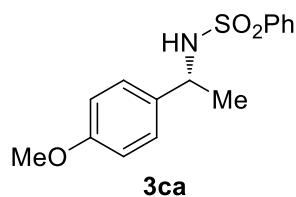

**(R)-N-(1-(4-methoxyphenyl)ethyl)benzenesulfonamide (3ca)<sup>[3]</sup>**

White solid, 82% yield, 98% *ee*. Mp 98-99 °C.  $[\alpha]_{\text{D}}^{20} = +78.7$  ( $c = 0.82$ ,  $\text{CH}_2\text{Cl}_2$ ).  $^1\text{H}$  NMR (400 MHz,  $\text{CDCl}_3$ ):  $\delta$  7.65 (d,  $J = 7.6$  Hz, 2H), 7.40 (t,  $J = 7.5$  Hz, 1H), 7.30 (t,  $J = 7.6$  Hz, 2H), 6.92 (d,  $J = 8.8$  Hz, 2H), 6.61 (d,  $J = 8.8$  Hz, 2H), 5.25 (d,  $J = 7.2$  Hz, 1H), 4.39-4.32 (m, 1H), 3.65 (s, 3H), 1.32 (d,  $J = 6.8$  Hz, 3H). The *ee* of **3ca** was determined by HPLC analysis using Daicel Chiralcel OD-H column (25 cm  $\times$  0.46 cm ID), conditions: *n*-hexane/*i*-PrOH = 90/10, 0.8 mL/min, 240 nm;  $t_{\text{major}} = 20.0$  min,  $t_{\text{minor}} = 23.3$  min.

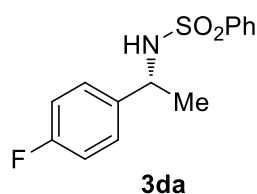

**(R)-N-(1-(4-fluorophenyl)ethyl)benzenesulfonamide (3da)<sup>[3]</sup>**

White solid, 81% yield, 99% *ee*. Mp 141-142 °C.  $[\alpha]_{\text{D}}^{20} = +64.7$  ( $c = 0.68$ ,  $\text{CH}_2\text{Cl}_2$ ).  $^1\text{H}$  NMR (400 MHz,  $\text{CDCl}_3$ ):  $\delta$  7.72-7.70 (m, 2H), 7.51-7.47 (m, 1H), 7.40-7.35 (m, 2H), 7.07-7.04 (m, 2H), 6.85-6.80 (m, 2H), 5.46 (d,  $J = 7.2$  Hz, 1H), 4.48 (m, 1H), 1.39 (d,  $J = 7.2$  Hz, 3H). The *ee* of **3da** was determined by HPLC analysis using Daicel Chiralcel OD-H column (25 cm  $\times$  0.46 cm ID), conditions: *n*-hexane/*i*-PrOH = 70/30, 0.5 mL/min, 240 nm;  $t_{\text{major}} = 10.9$  min,  $t_{\text{minor}} = 12.3$  min.

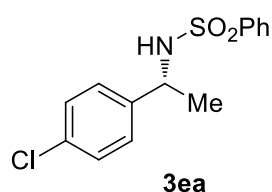

**(R)-N-(1-(4-chlorophenyl)ethyl)benzenesulfonamide (3ea)<sup>[3]</sup>**

White solid, 76% yield, 98% *ee*. Mp 153-155 °C.  $[\alpha]_{\text{D}}^{20} = +81.3$  ( $c = 0.62$ ,  $\text{CH}_2\text{Cl}_2$ ).  $^1\text{H}$  NMR (400 MHz,  $\text{CDCl}_3$ ):  $\delta$  7.71-7.69 (m, 2H), 7.53-7.49 (m, 1H), 7.40-7.36 (m, 2H), 7.14-7.11 (m, 2H), 7.04-7.01 (m, 2H), 5.25 (d,  $J = 6.8$  Hz, 1H), 4.51-4.44 (m, 1H), 1.39 (d,  $J = 6.8$  Hz, 3H). The *ee* of **3ea** was determined by HPLC analysis using Daicel Chiralcel OJ-H column (25 cm  $\times$  0.46 cm ID), conditions: *n*-hexane/*i*-PrOH = 70/30, 1 mL/min, 240 nm;  $t_{\text{major}} = 9.9$  min,  $t_{\text{minor}} = 11.2$  min.

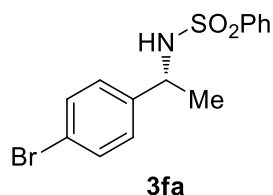

**(R)-N-(1-(4-bromophenyl)ethyl)benzenesulfonamide (3fa)**<sup>[3]</sup>

White solid, 65% yield, 99% *ee*. Mp 158-159 °C.  $[\alpha]_{\text{D}}^{20} = +71.1$  ( $c = 0.54$ ,  $\text{CH}_2\text{Cl}_2$ ).  $^1\text{H}$  NMR (400 MHz,  $\text{CDCl}_3$ ):  $\delta$  7.63-7.61 (m, 2H), 7.44 (t,  $J = 7.6$  Hz, 1H), 7.31 (t,  $J = 8.0$  Hz, 2H), 7.21 (t,  $J = 6.4$  Hz, 2H), 6.89 (d,  $J = 8.4$  Hz, 2H), 5.22 (d,  $J = 6.8$  Hz, 1H), 4.42-4.35 (m, 1H), 1.31 (d,  $J = 6.8$  Hz, 3H). The *ee* of **3fa** was determined by HPLC analysis using Daicel Chiralcel AS-H column (25 cm  $\times$  0.46 cm ID), conditions: *n*-hexane/*i*-PrOH = 70/30, 1 mL/min, 240 nm;  $t_{\text{major}} = 13.3$  min,  $t_{\text{minor}} = 20.5$  min.

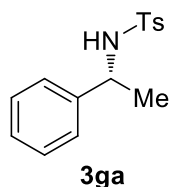**(R)-4-methyl-N-(1-phenylethyl)benzenesulfonamide (3ga)**<sup>[2]</sup>

White solid, 90% yield, 99% *ee*. Mp 106-108 °C.  $[\alpha]_{\text{D}}^{20} = +79.5$  ( $c = 0.86$ ,  $\text{CH}_2\text{Cl}_2$ ).  $^1\text{H}$  NMR (400 MHz,  $\text{CDCl}_3$ )  $\delta$  7.62 (d,  $J = 8.4$  Hz, 2H), 7.20-7.14 (m, 5H), 5.23 (d,  $J = 7.2$  Hz, 1H), 4.48-4.41 (m, 1H), 2.37 (s, 3H), 1.40 (d,  $J = 6.8$  Hz, 3H). The *ee* of **3ga** was determined by HPLC analysis using Daicel Chiralcel OJ-H column (25 cm  $\times$  0.46 cm ID), conditions: *n*-hexane/*i*-PrOH = 70/30, 1 mL/min, 240 nm;  $t_{\text{minor}} = 10.7$  min,  $t_{\text{major}} = 16.1$  min.

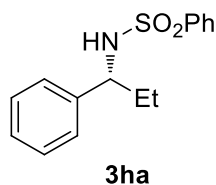**(R)-N-(1-phenylpropyl)benzenesulfonamide (3ha)**<sup>[3]</sup>

White solid, 63% yield, 98% *ee*. Mp 101-103 °C.  $[\alpha]_{\text{D}}^{20} = +66.6$  ( $c = 0.44$ ,  $\text{CH}_2\text{Cl}_2$ ).  $^1\text{H}$  NMR (400 MHz,  $\text{CDCl}_3$ ):  $\delta$  7.59-7.57 (m, 2H), 7.37-7.32 (m, 1H), 7.24-7.19 (m, 2H), 7.05-7.03 (m, 3H), 6.92 (dd,  $J = 7.2, 3.6$  Hz, 2H), 5.32 (d,  $J = 7.2$  Hz, 1H), 1.76-1.60 (m, 2H), 0.72 (t,  $J = 7.6$  Hz, 3H). The *ee* of **3ha** was determined by HPLC analysis using Daicel Chiralcel AD-H column (25 cm  $\times$  0.46 cm ID), conditions: *n*-hexane/*i*-PrOH = 90/10, 0.5 mL/min, 240 nm;  $t_{\text{minor}} = 21.6$  min,  $t_{\text{major}} = 22.9$  min.

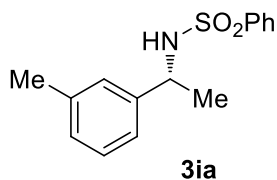**(R)-N-(1-(*m*-tolyl)ethyl)benzenesulfonamide (3ia)**

Colorless oil, 87% yield, 97% *ee*.  $[\alpha]_{\text{D}}^{20} = +70.8$  ( $c = 0.76$ ,  $\text{CH}_2\text{Cl}_2$ ).  $^1\text{H}$  NMR (400 MHz,  $\text{CDCl}_3$ ):  $\delta$  7.65-7.63 (m, 2H), 7.38 (t,  $J = 7.6$  Hz, 1H), 7.29-7.26 (t,  $J = 7.6$  Hz, 2H), 6.97 (t,  $J = 7.6$  Hz, 1H), 6.80 (dd,  $J = 19.6, 7.6$  Hz, 2H), 7.75 (s, 1H), 5.37 (d,  $J = 7.2$  Hz, 1H), 4.40-4.33 (m, 1H), 2.10 (s, 3H), 1.33 (d,  $J = 6.8$  Hz, 3H).  $^{13}\text{C}$  NMR (100 MHz,  $\text{CDCl}_3$ ):  $\delta$

140.7, 139.7, 137.1, 131.2, 127.7, 127.4, 127.1, 125.9, 125.8, 122.1, 52.7, 22.5, 20.2. HRMS calcd for  $C_{15}H_{17}NO_2S$   $[M]^+$ : 275.0980. Found: 275.0984. The *ee* of **3ia** was determined by HPLC analysis using Daicel Chiralcel OD-H column (25 cm × 0.46 cm ID), conditions: *n*-hexane/*i*-PrOH = 80/20, 0.5 mL/min, 240 nm;  $t_{major}$  = 10.9 min,  $t_{minor}$  = 12.2 min.

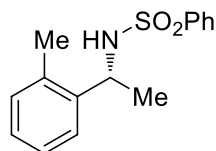**3ja**

**(R)-N-(1-(*o*-tolyl)ethyl)benzenesulfonamide (3ja)**

White solid, 73% yield, >99% *ee*. Mp 111-112 °C.  $[\alpha]_D^{20}$  = +42.7 (c = 0.66,  $CH_2Cl_2$ ).  $^1H$  NMR (400 MHz,  $CDCl_3$ ):  $\delta$  7.73-7.71 (m, 2H), 7.49-7.45 (m, 1H), 7.38-7.34 (m, 2H), 7.14-7.01 (m, 4H), 5.39 (d,  $J$  = 6.8 Hz, 1H), 4.82-4.75 (m, 1H), 2.22 (s, 3H), 1.42 (d,  $J$  = 6.8 Hz, 3H).  $^{13}C$  NMR (100 MHz,  $CDCl_3$ ):  $\delta$  140.6, 140.1, 134.5, 132.3, 130.4, 128.8, 127.3, 126.9, 126.4, 125.3, 49.8, 23.2, 18.9. HRMS calcd for  $C_{15}H_{17}NO_2S$   $[M]^+$ : 275.0980. Found: 275.0979. The *ee* of **3ja** was determined by HPLC analysis using Daicel Chiralcel OJ-H column (25 cm × 0.46 cm ID), conditions: *n*-hexane/*i*-PrOH = 70/30, 1 mL/min, 240 nm;  $t_{minor}$  = 6.9 min,  $t_{major}$  = 10.5 min.

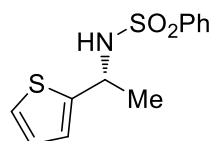**3ka**

**(R)-N-(1-(thiophen-2-yl)ethyl)benzenesulfonamide (3ka)**

White solid, 94% yield, 95% *ee*. Mp 93-95 °C.  $[\alpha]_D^{20}$  = +63.3 (c = 0.80,  $CH_2Cl_2$ ).  $^1H$  NMR (400 MHz,  $CDCl_3$ ):  $\delta$  7.83-7.80 (m, 2H), 7.55-7.51 (m, 1H), 7.46-7.42 (m, 2H), 7.09 (dd,  $J$  = 5.2, 1.2 Hz, 1H), 6.80-6.72 (m, 1H), 6.75-6.74 (m, 1H), 5.30 (d,  $J$  = 7.6 Hz, 1H), 4.80-4.73 (m, 1H), 1.52 (d,  $J$  = 6.8 Hz, 1H).  $^{13}C$  NMR ( $CDCl_3$ , 100 MHz):  $\delta$  145.9, 140.6, 132.6, 129.0, 127.1, 126.7, 124.8, 124.5, 49.3, 24.0. HRMS calcd for  $C_{12}H_{13}NO_2S_2$   $[M]^+$ : 267.0387. Found: 267.0391. The *ee* of **3ka** was determined by HPLC analysis using Daicel Chiralcel OD-H column (25 cm × 0.46 cm ID), conditions: *n*-hexane/*i*-PrOH = 90/10, 1 mL/min, 240 nm;  $t_{major}$  = 12.2 min,  $t_{minor}$  = 14.2 min.

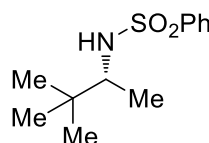**3la**

**(R)-N-(3,3-dimethylbutan-2-yl)benzenesulfonamide (3la)<sup>[4]</sup>**

White solid, 80% yield, 96% *ee*. Mp 116-119 °C.  $[\alpha]_D^{20}$  = +4.5 (c = 0.44,  $CH_2Cl_2$ ).  $^1H$  NMR (400 MHz,  $CDCl_3$ ):  $\delta$  7.91-7.89 (m, 2H), 7.59-7.49 (m, 3H), 4.61 (d,  $J$  = 7.6 Hz, 2H),

3.11-3.03 (m, 1H), 0.88 (d,  $J = 6.8$  Hz, 3H), 0.83 (s, 9H). The *ee* of **3la** was determined by HPLC analysis using Daicel Chiralcel OD-H column (25 cm × 0.46 cm ID), conditions: *n*-hexane/*i*-PrOH = 95/5, 0.5 mL/min, 240 nm;  $t_{\text{minor}} = 20.1$  min,  $t_{\text{major}} = 21.4$  min.

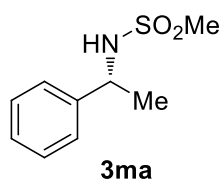

**(R)-N-(1-phenylethyl)methanesulfonamide (3ma)<sup>[5]</sup>**

Colorless oil, 81% yield, 99% *ee*.  $[\alpha]_{\text{D}}^{20} = 52.6$  ( $c = 0.50$ ,  $\text{CH}_2\text{Cl}_2$ ).  $^1\text{H}$  NMR (400 MHz,  $\text{CDCl}_3$ ):  $\delta$  7.39-7.28 (m, 5H), 5.18(d,  $J = 7.2$  Hz, 1H), 4.64 (m, 1H), 2.60 (s, 3H), 1.54 (d,  $J = 7.2$ , 3H). The *ee* of **3ma** was determined by HPLC analysis using Daicel Chiralcel OJ-H column (25 cm × 0.46 cm ID), conditions: *n*-hexane/*i*-PrOH = 70/30, 0.5 mL/min, 220 nm;  $t_{\text{minor}} = 18.7$  min,  $t_{\text{major}} = 19.3$  min.

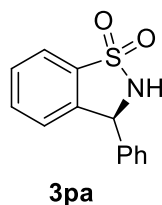

**(S)-3-phenyl-2,3-dihydrobenzo[d]isothiazole 1,1-dioxide (3pa)<sup>[6]</sup>**

White solid, 90% yield, 90% *ee*. Mp 115-118 °C.  $[\alpha]_{\text{D}}^{20} = +71.5$  ( $c = 0.54$ ,  $\text{CH}_2\text{Cl}_2$ ).  $^1\text{H}$  NMR (400 MHz,  $\text{CDCl}_3$ )  $\delta$  7.79-7.77 (m, 1H), 7.53-7.51 (m, 2H), 7.36-7.35 (m, 5H), 7.13-7.11 (m, 1H), 5.71 (d,  $J = 4.0$  Hz, 1H), 5.37-5.32 (m, 1H). The *ee* of **3ma** was determined by HPLC analysis using Daicel Chiralcel OD-H column (25 cm × 0.46 cm ID), conditions: *n*-hexane/*i*-PrOH = 70/30, 0.8 mL/min, 230 nm;  $t_{\text{major}} = 15.3$  min  $t_{\text{minor}} = 17.8$  min.

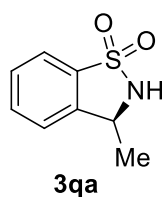

**(S)-3-methyl-2,3-dihydrobenzo[d]isothiazole 1,1-dioxide (3qa)<sup>[6]</sup>**

White solid, 62% yield, 84% *ee*. Mp 95-98°C.  $[\alpha]_{\text{D}}^{20} = -15.5$  ( $c = 0.20$ ,  $\text{CH}_2\text{Cl}_2$ ).  $^1\text{H}$  NMR (400 MHz,  $\text{CDCl}_3$ )  $\delta$  7.76 (d,  $J = 7.6$  Hz, 1H), 7.64 (t,  $J = 7.4$  Hz, 1H), 7.53 (t,  $J = 7.4$  Hz, 1H), 7.40 (d,  $J = 8.0$  Hz, 1H), 5.12(d,  $J = 27.6$  Hz, 1H), 4.83-4.77 (m, 1H), 1.61 (dd,  $J = 6.8, 2.4$  Hz, 3H). The *ee* of **3na** was determined by HPLC analysis using Daicel Chiralcel OD-H column (25 cm × 0.46 cm ID), conditions: *n*-hexane/*i*-PrOH = 80/20, 0.8mL/min, 230 nm;  $t_{\text{major}} = 24.6$  min,  $t_{\text{minor}} = 31.3$  min.

**Notes and references:**

- [1] Q. Yang, G. Shang, W.-Z. Gao, J.-G. Deng, X.-M. Zhang, *Angew. Chem. Int. Ed.*, 2006, **45**, 3832-3835
- [2] C.-B. Yu, D.-W. Wang, Y.-G. Zhou, *J. Org. Chem.*, 2009, **74**, 5633-5635.
- [3] R. Giles, J. O'Neill, J. H. Lee, M. K. Chiu, K. W. Jung, *Tetrahedron Lett.*, 2013, **54**, 4083-4085.
- [4] Z. Petkova, M. Stoyanova, V. Dimitrov, *Tetrahedron Lett.*, 2014, **55**, 2093-2096.
- [5] A. D. Gillie, R. J. Reddy, P. W. Davies, *Adv. Synth. Catal.*, 2016, **358**, 226-239.
- [6] Y.-Q. Wang, S.-M. Lu, Y.-G. Zhou, *J. Org. Chem.* 2007, **72**, 3729-3734.



## D: NMR Spectra of Products

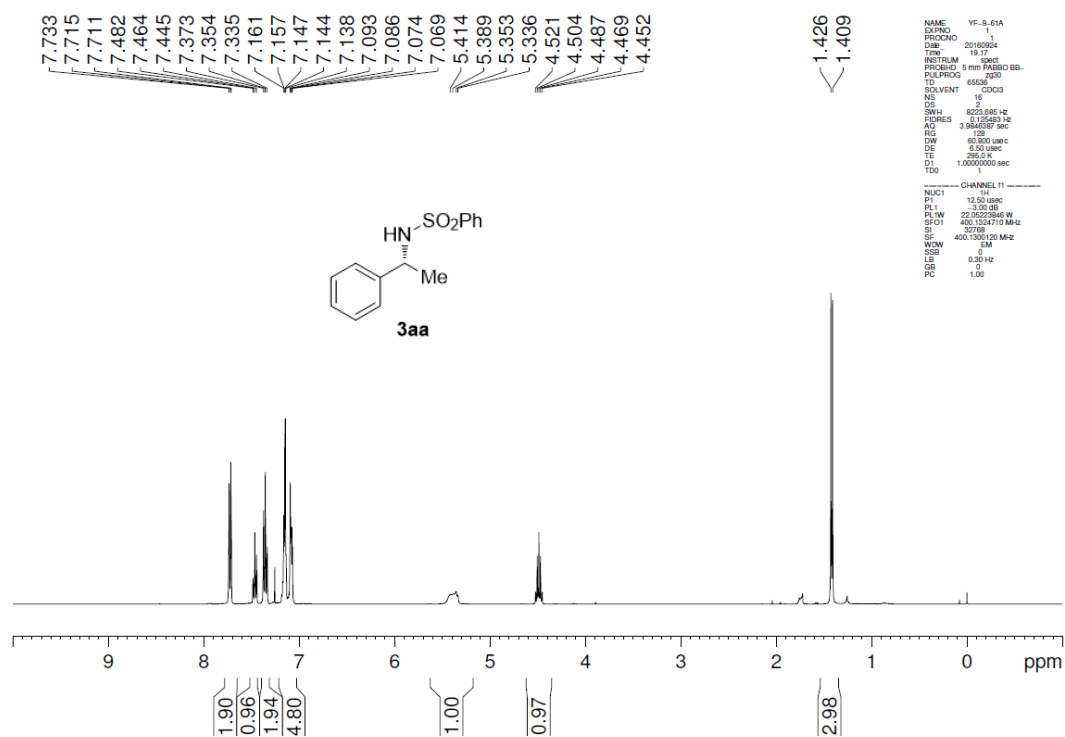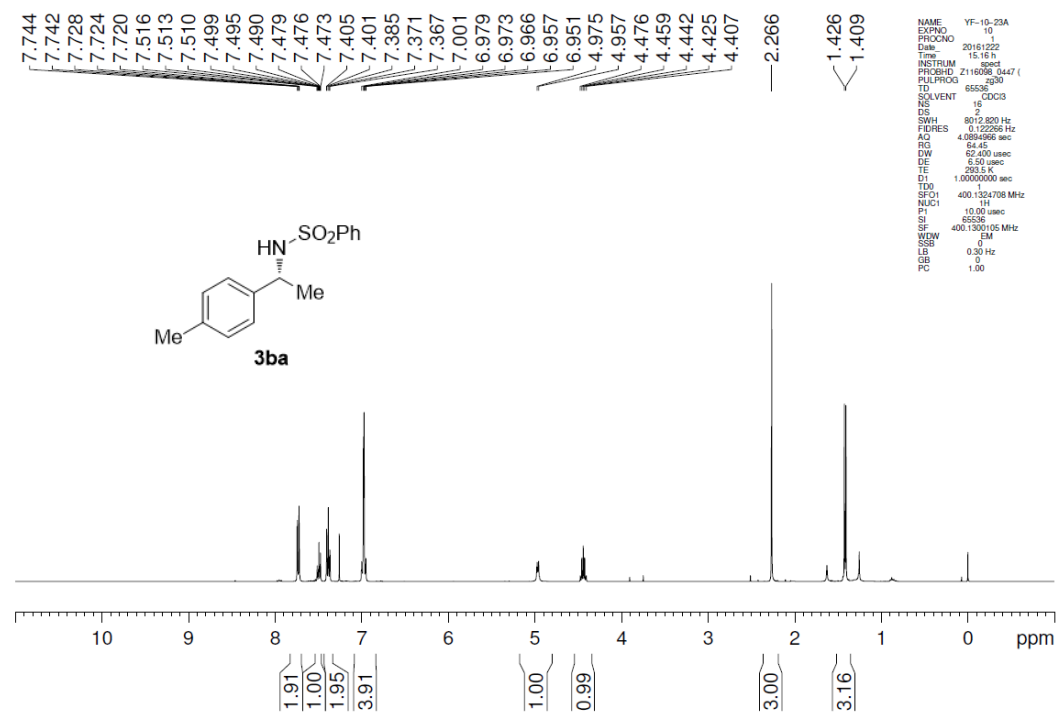

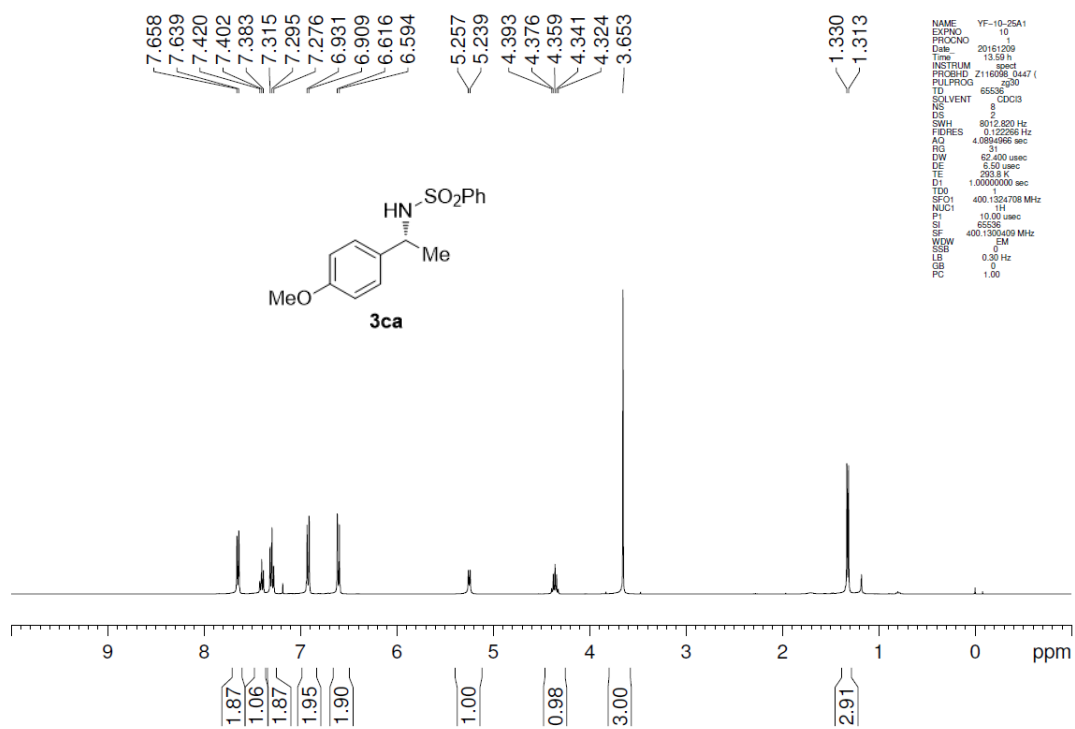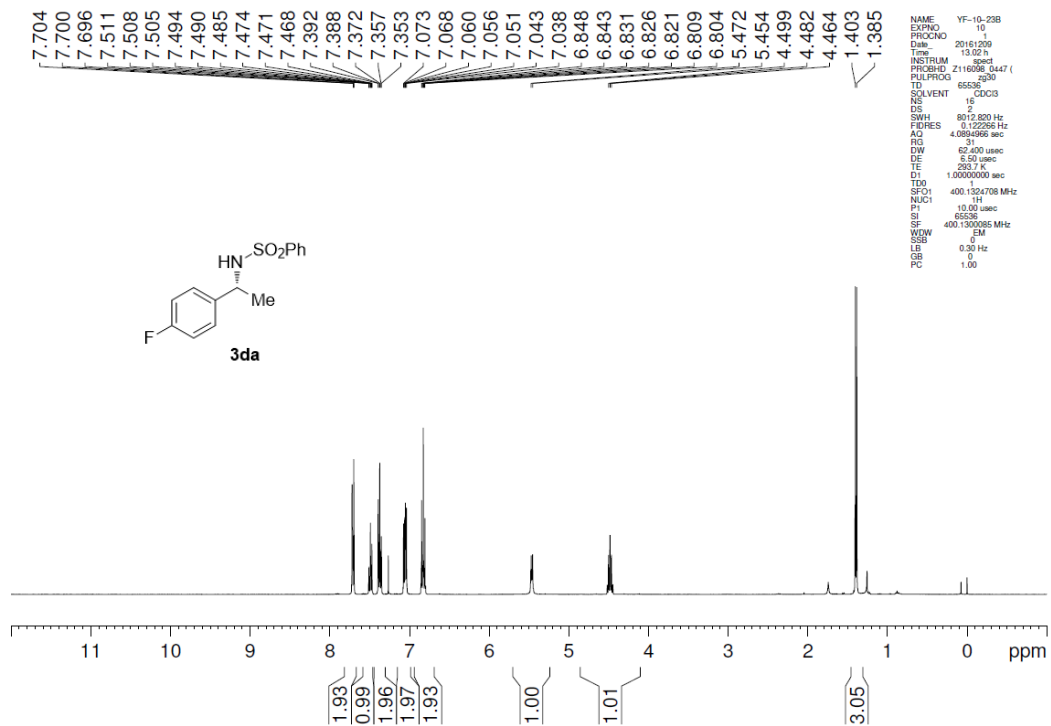

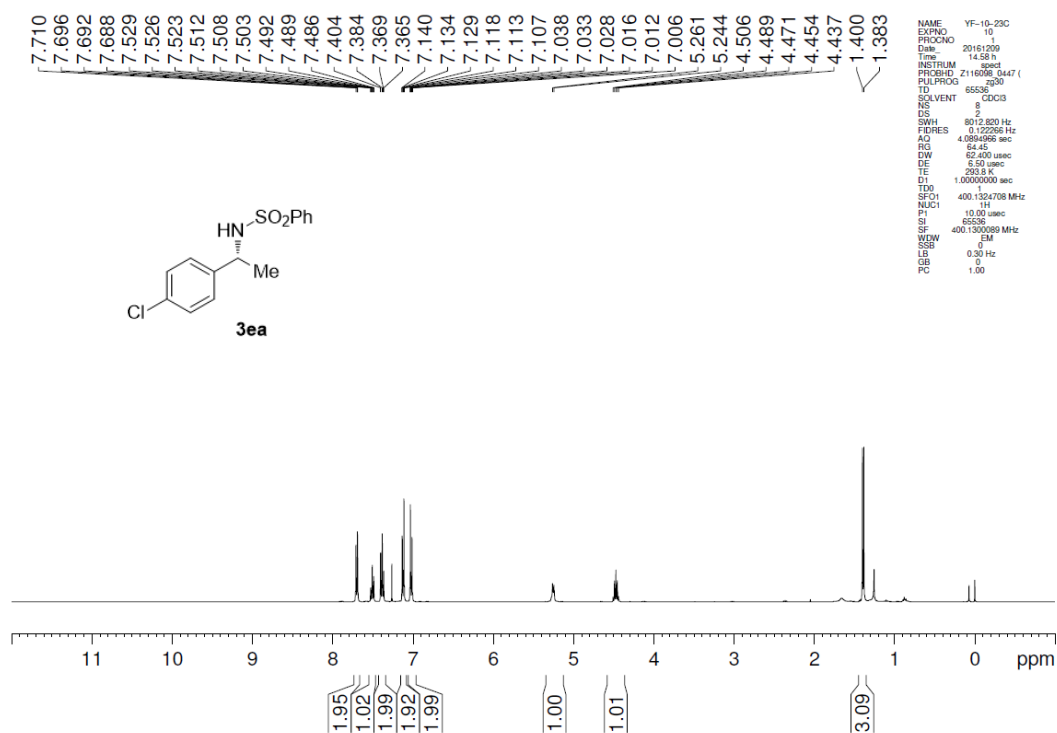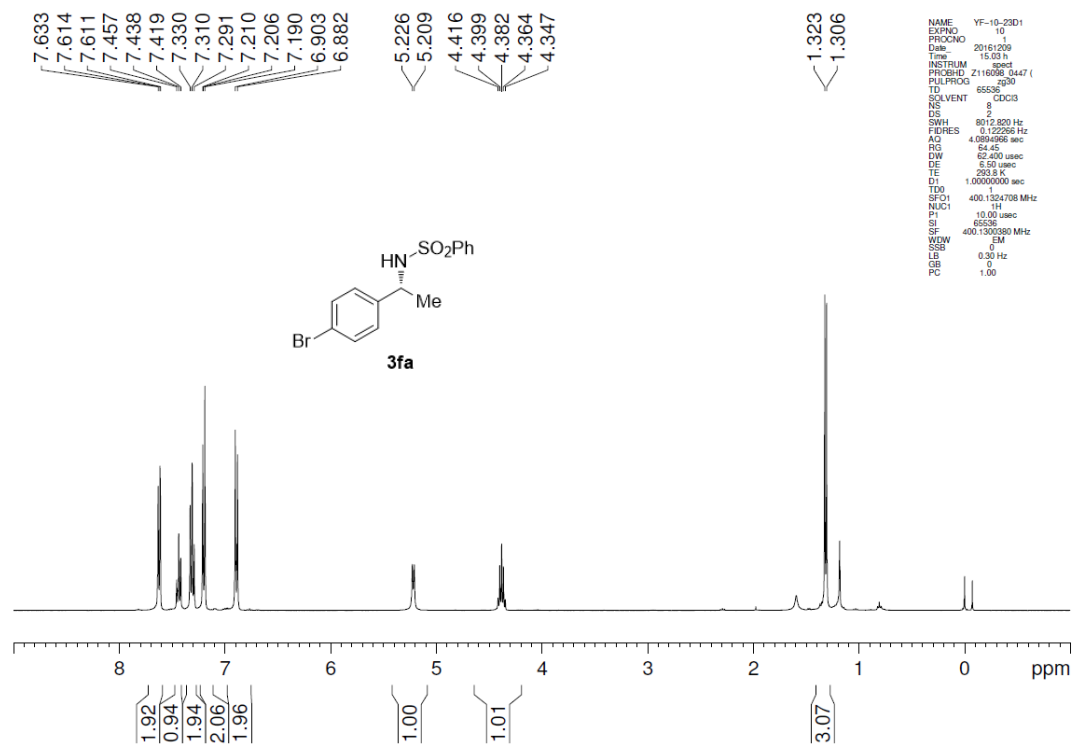

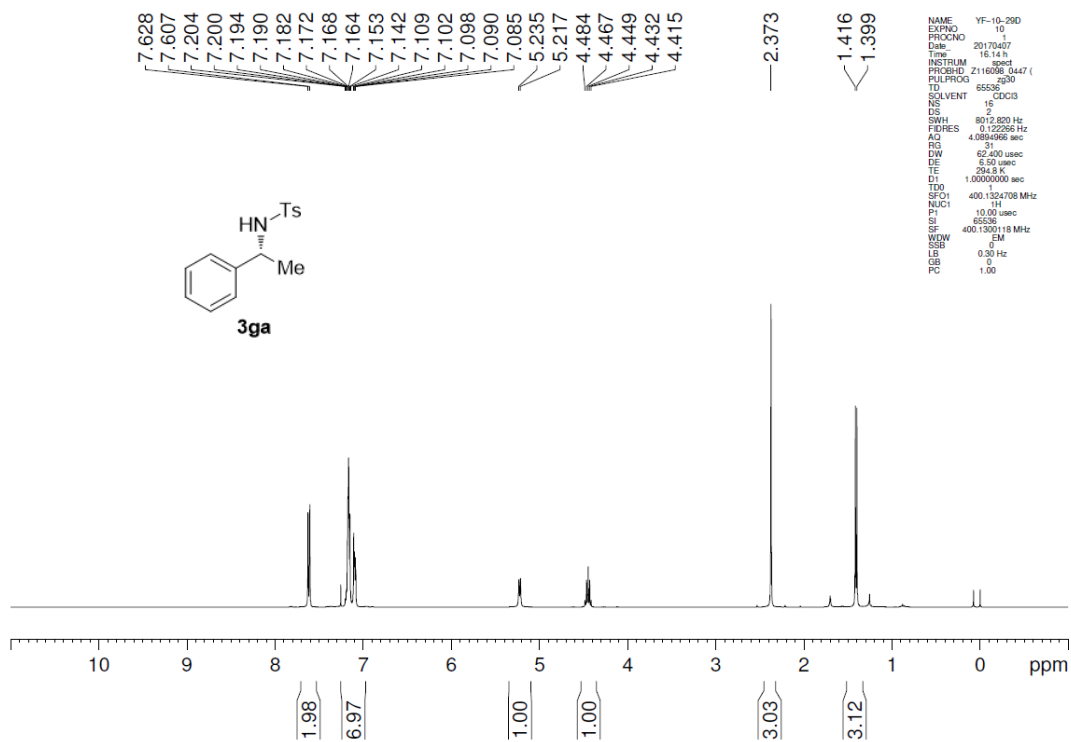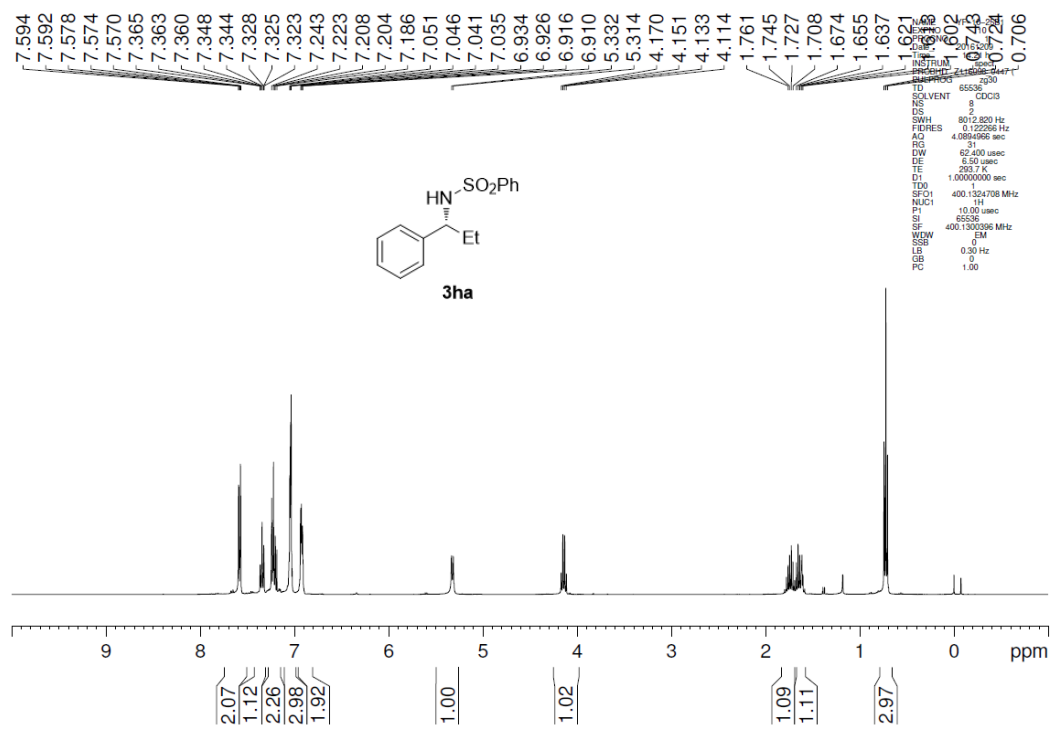

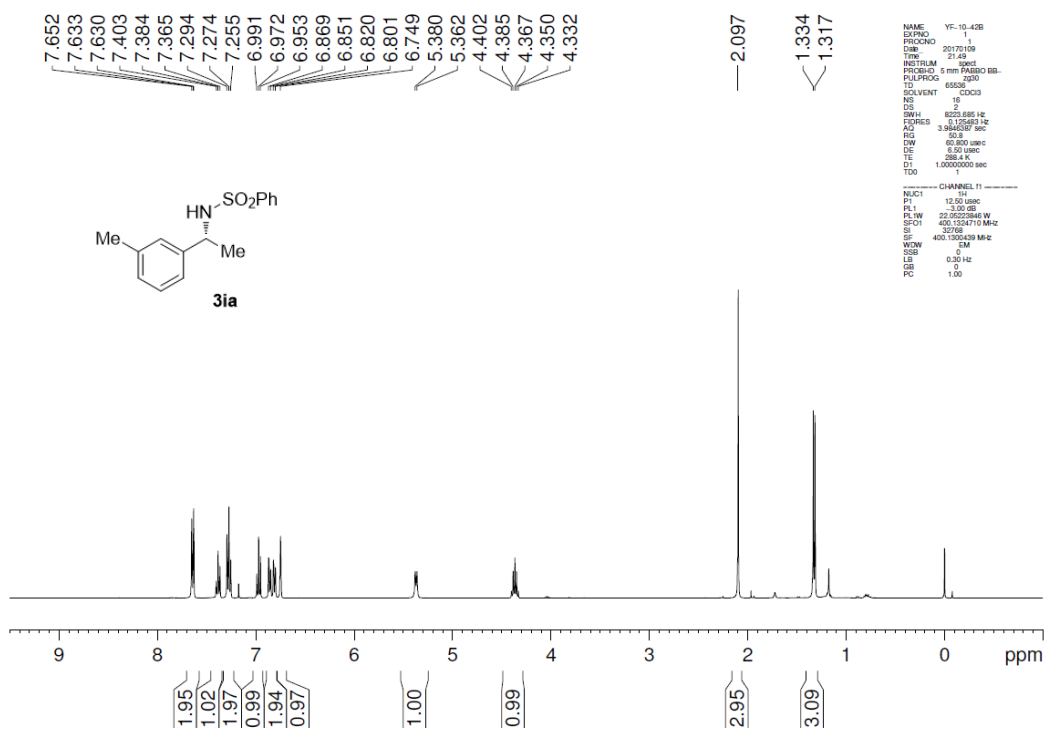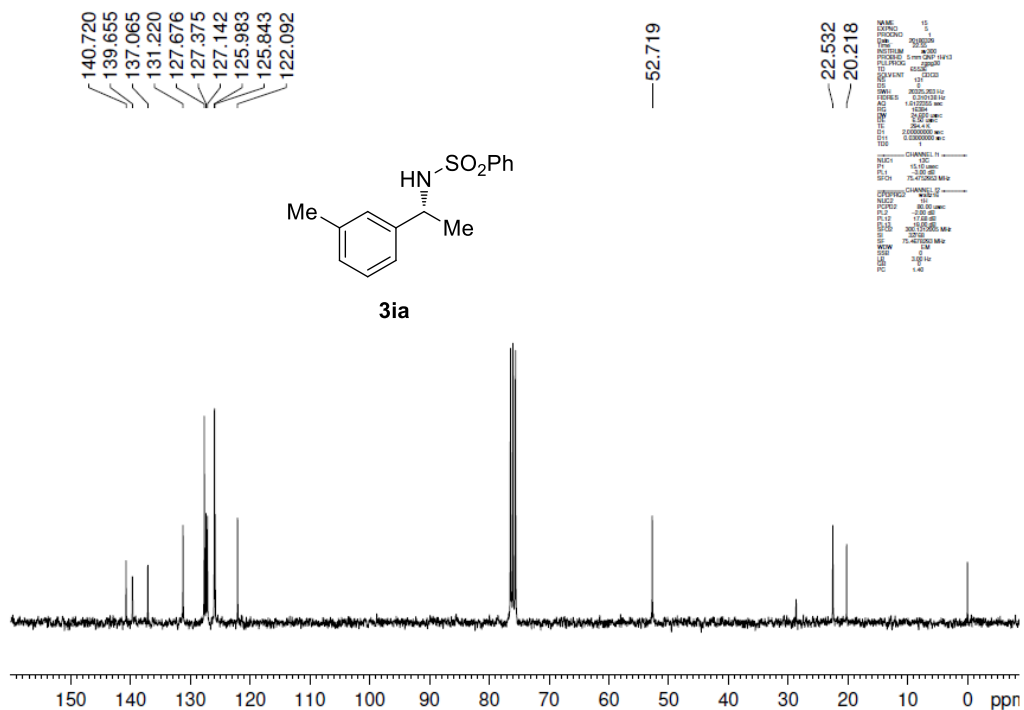

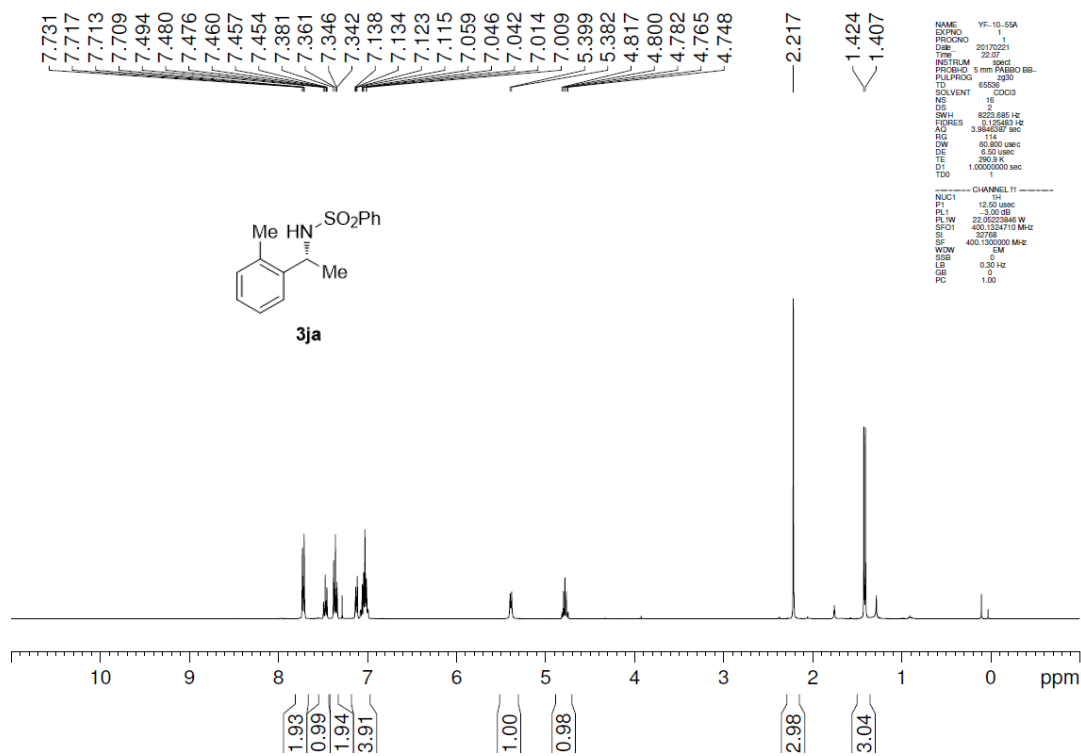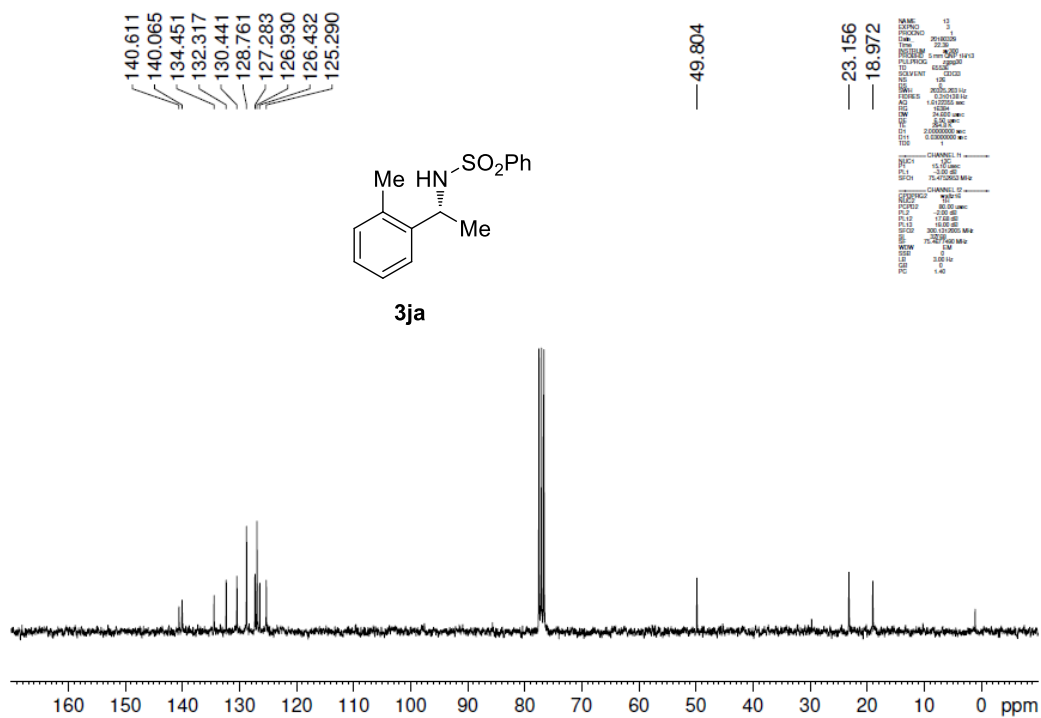

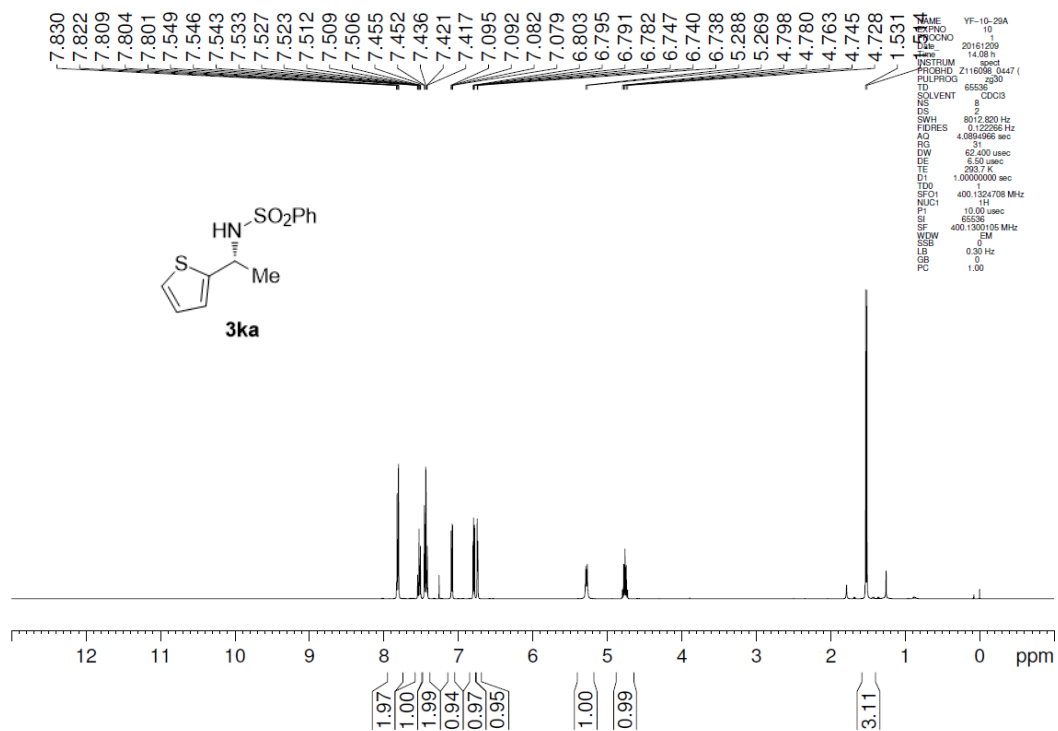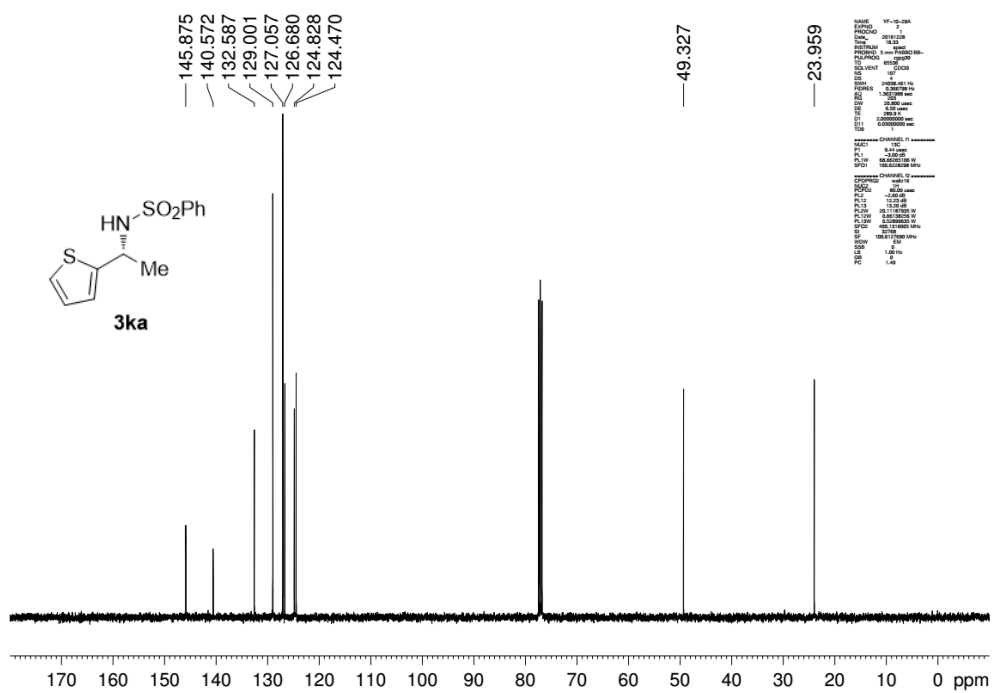

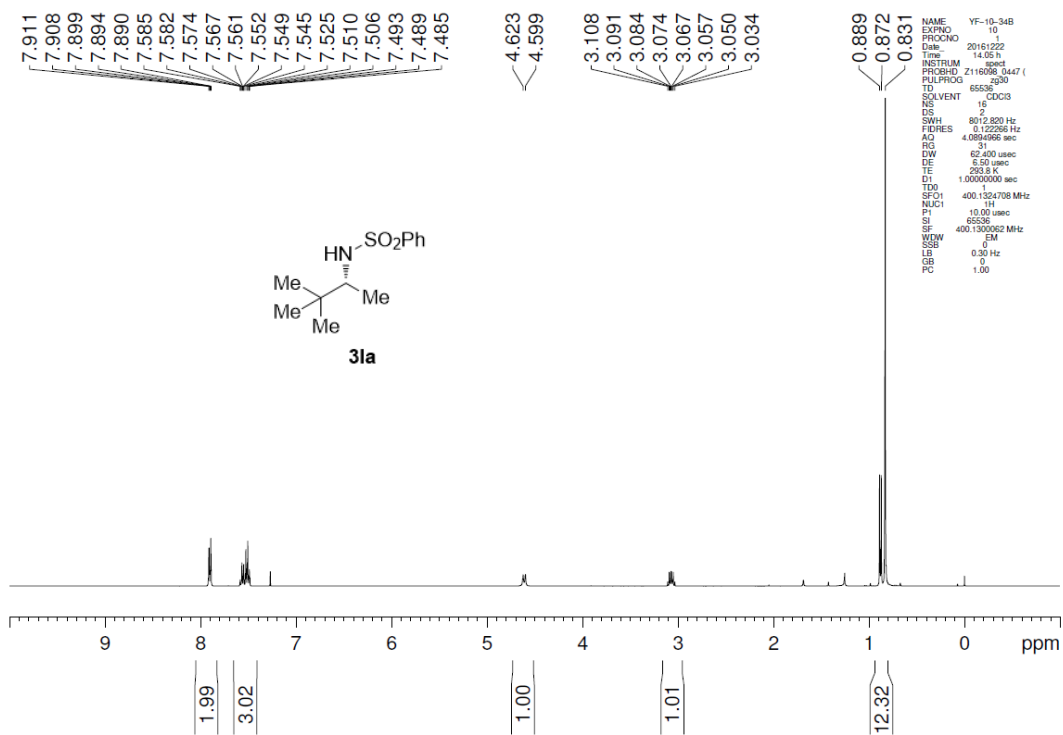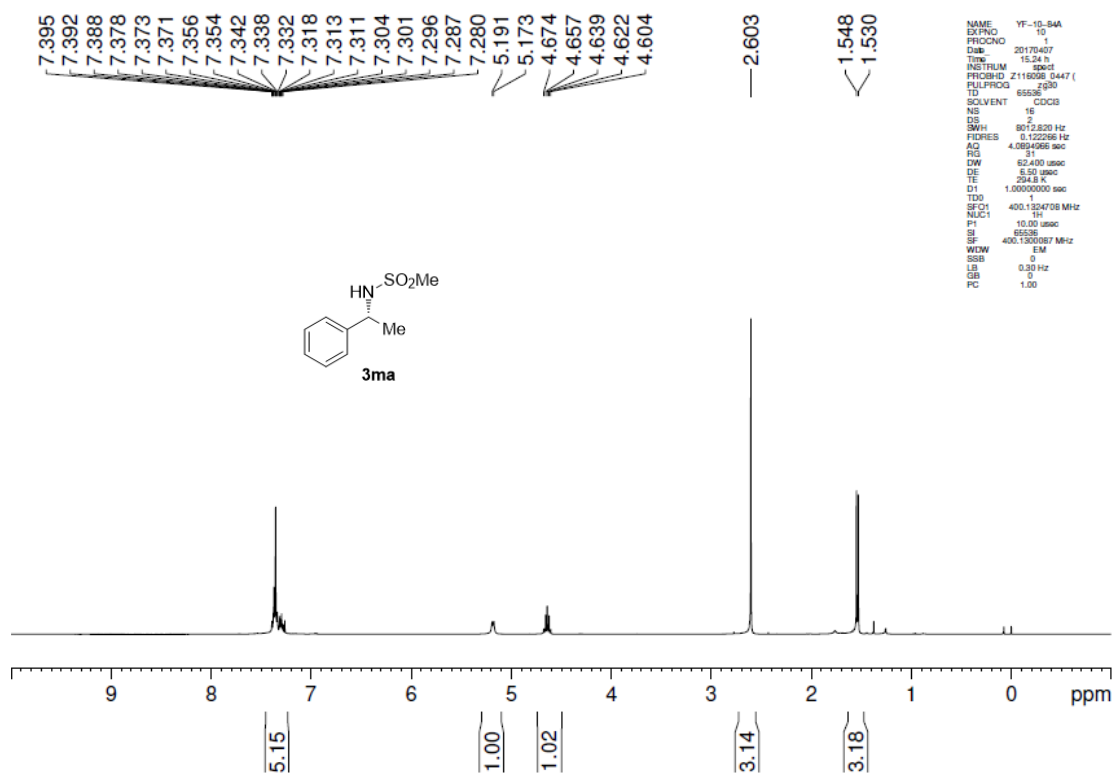



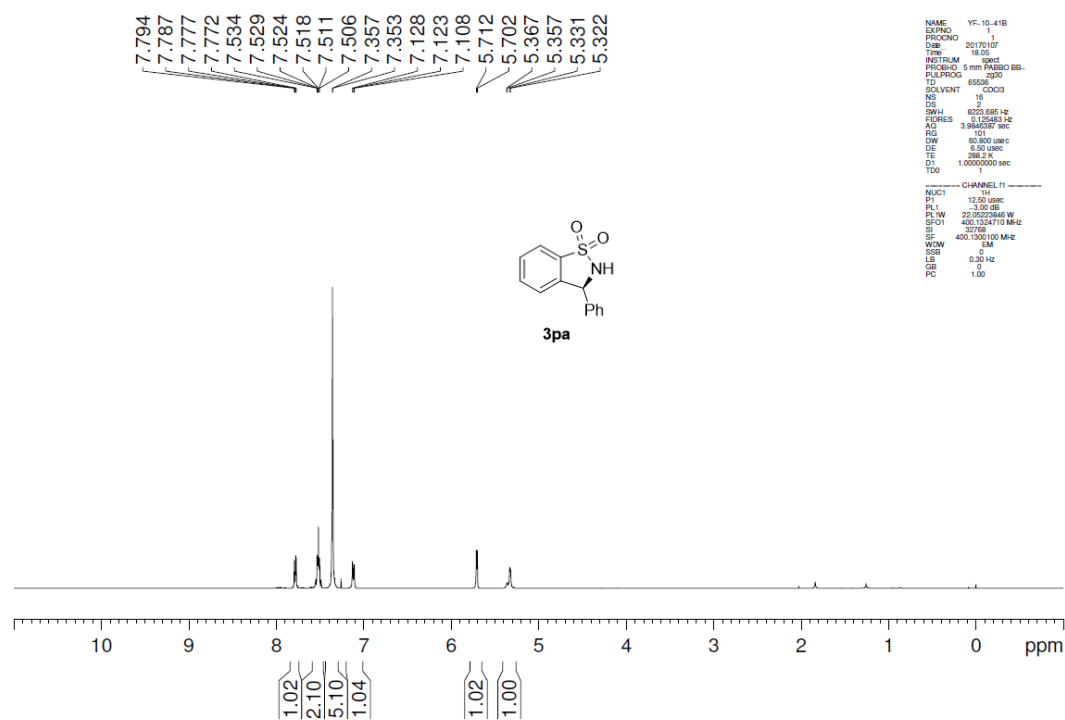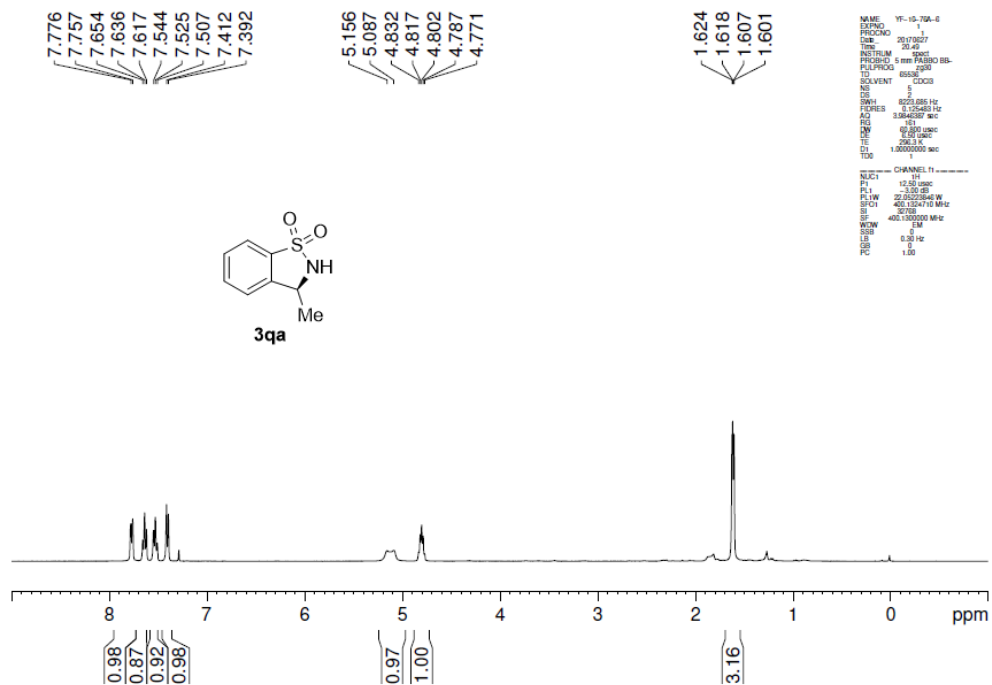

## E: HPLC Spectra of Products

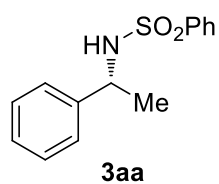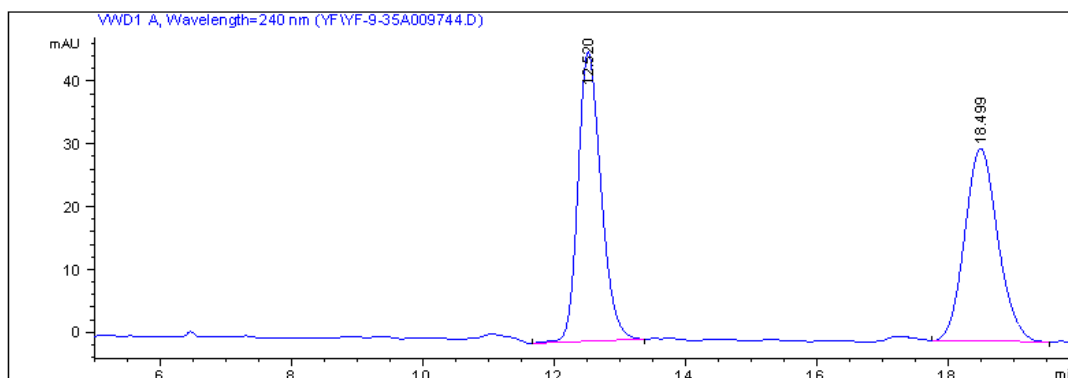

| Peak # | RetTime [min] | Type | Width [min] | Area [mAU*s] | Height [mAU] | Area %  |
|--------|---------------|------|-------------|--------------|--------------|---------|
| 1      | 12.520        | BB   | 0.3752      | 1122.27161   | 46.06736     | 51.0666 |
| 2      | 18.499        | BB   | 0.5420      | 1075.39185   | 30.67477     | 48.9334 |

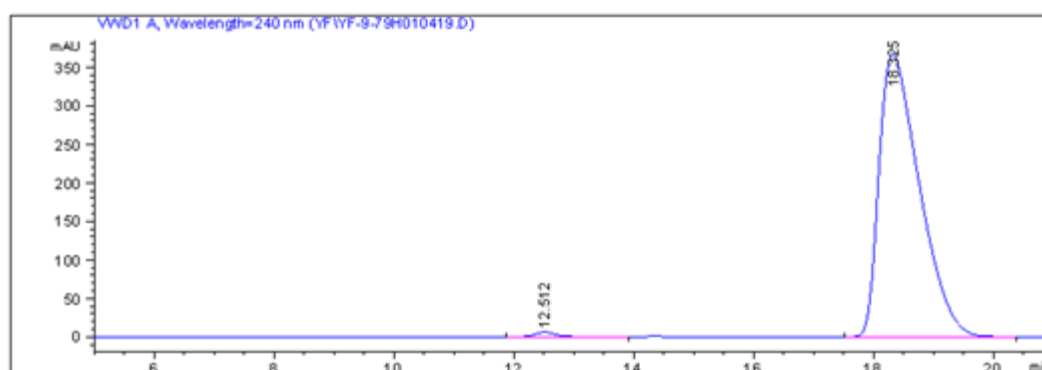

| Peak # | RetTime [min] | Type | Width [min] | Area [mAU*s] | Height [mAU] | Area %  |
|--------|---------------|------|-------------|--------------|--------------|---------|
| 1      | 12.512        | BB   | 0.4159      | 163.57930    | 5.92804      | 0.9457  |
| 2      | 18.325        | BB   | 0.7137      | 1.71332e4    | 366.95953    | 99.0543 |

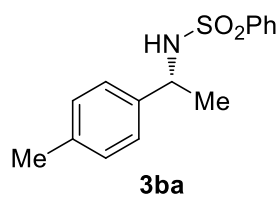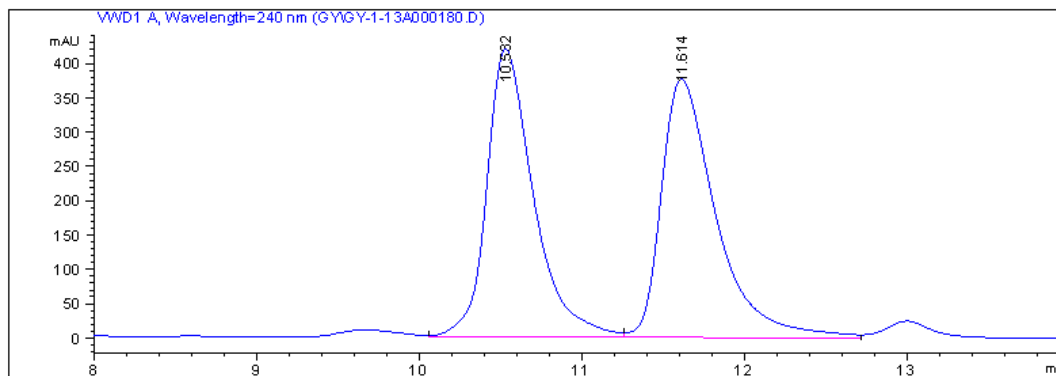

| Peak # | RetTime [min] | Type | Width [min] | Area [mAU*s] | Height [mAU] | Area %  |
|--------|---------------|------|-------------|--------------|--------------|---------|
| 1      | 10.532        | VV   | 0.3011      | 8419.28711   | 419.61191    | 48.9716 |
| 2      | 11.614        | VV   | 0.3512      | 8772.88770   | 376.03952    | 51.0284 |

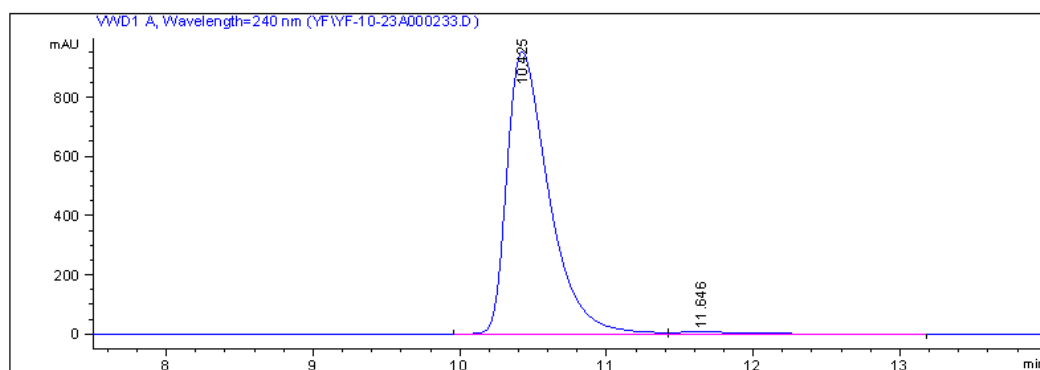

| Peak # | RetTime [min] | Type | Width [min] | Area [mAU*s] | Height [mAU] | Area %  |
|--------|---------------|------|-------------|--------------|--------------|---------|
| 1      | 10.425        | BV   | 0.3015      | 1.88970e4    | 952.15991    | 98.5889 |
| 2      | 11.646        | VB   | 0.4577      | 270.46820    | 8.13909      | 1.4111  |

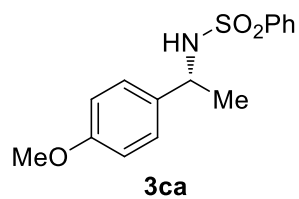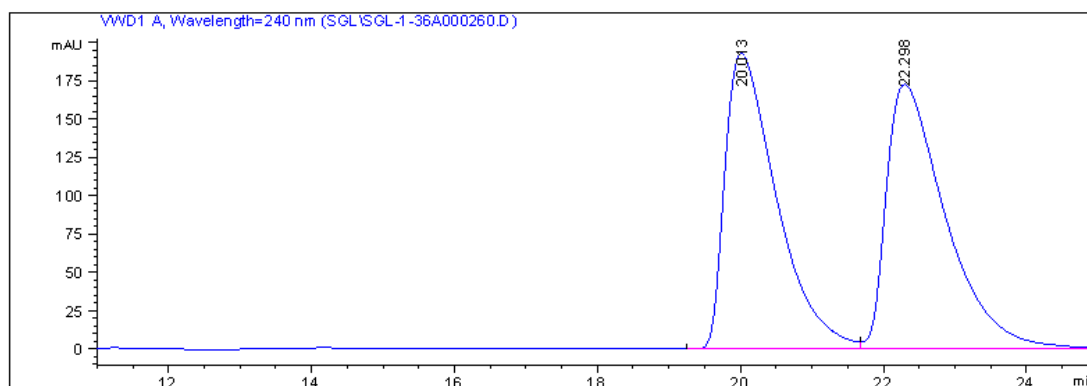

| Peak # | RetTime [min] | Type | Width [min] | Area [mAU*s] | Height [mAU] | Area %  |
|--------|---------------|------|-------------|--------------|--------------|---------|
| 1      | 20.013        | BV   | 0.7615      | 9670.74805   | 192.68793    | 49.3074 |
| 2      | 22.298        | VBA  | 0.8735      | 9942.43750   | 172.23538    | 50.6926 |

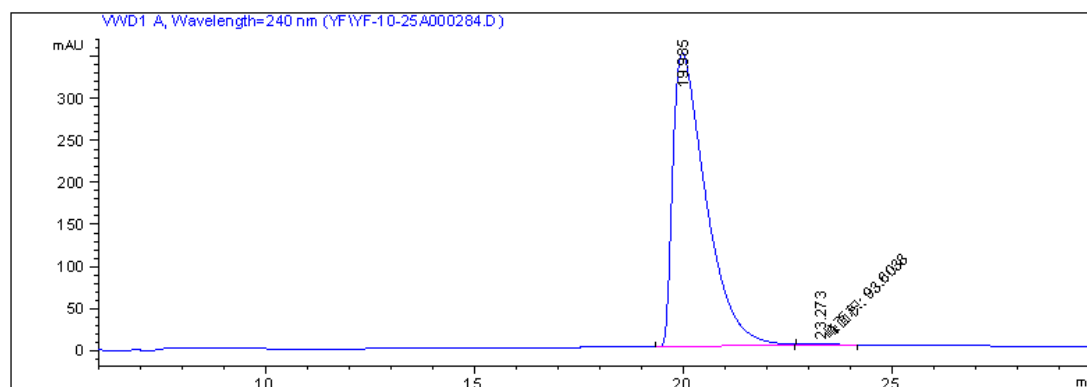

| Peak # | RetTime [min] | Type | Width [min] | Area [mAU*s] | Height [mAU] | Area %  |
|--------|---------------|------|-------------|--------------|--------------|---------|
| 1      | 19.985        | BB   | 0.8324      | 1.91996e4    | 349.21924    | 99.5148 |
| 2      | 23.273        | MM   | 0.8097      | 93.60379     | 1.92672      | 0.4852  |

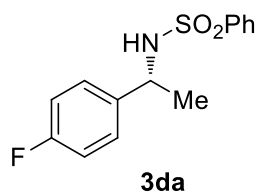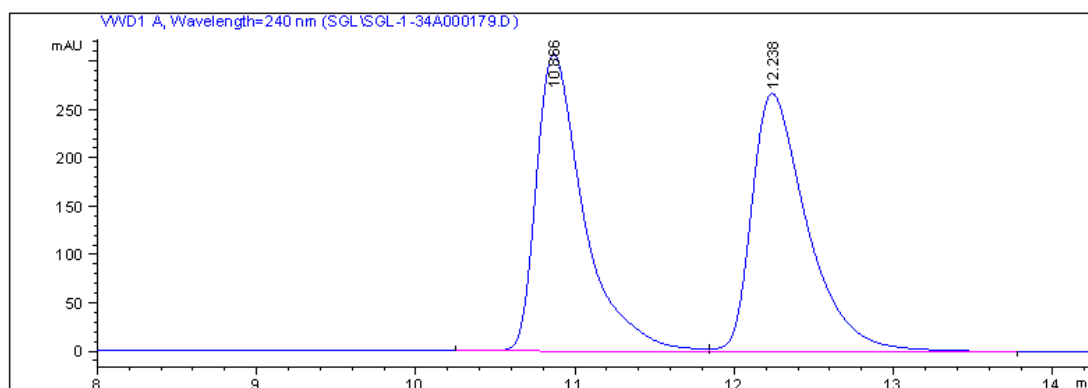

| Peak # | RetTime [min] | Type | Width [min] | Area [mAU*s] | Height [mAU] | Area %  |
|--------|---------------|------|-------------|--------------|--------------|---------|
| 1      | 10.866        | BV   | 0.3111      | 6383.38867   | 307.56976    | 49.7951 |
| 2      | 12.238        | VB   | 0.3634      | 6435.93359   | 266.83139    | 50.2049 |

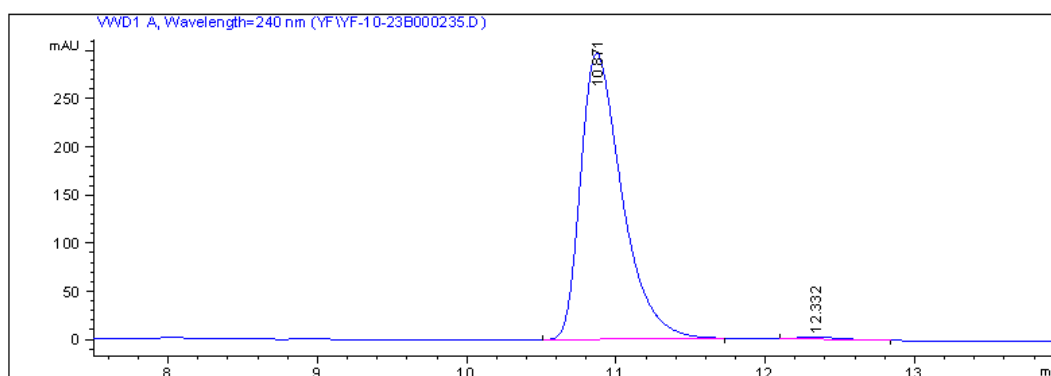

| Peak # | RetTime [min] | Type | Width [min] | Area [mAU*s] | Height [mAU] | Area %  |
|--------|---------------|------|-------------|--------------|--------------|---------|
| 1      | 10.871        | BB   | 0.2926      | 5716.16016   | 296.90973    | 99.3561 |
| 2      | 12.332        | BB   | 0.2920      | 37.04686     | 1.97327      | 0.6439  |

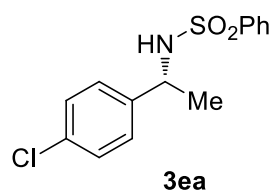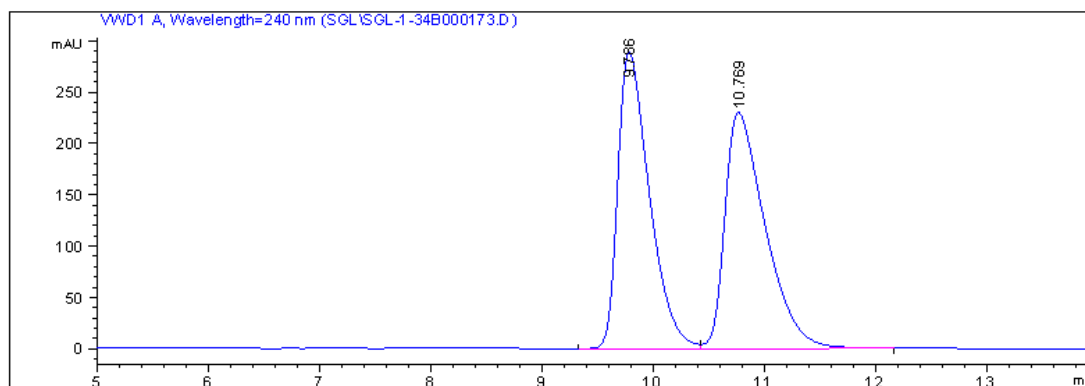

| Peak # | RetTime [min] | Type | Width [min] | Area [mAU*s] | Height [mAU] | Area %  |
|--------|---------------|------|-------------|--------------|--------------|---------|
| 1      | 9.786         | BV   | 0.2992      | 5695.89355   | 288.72711    | 49.5854 |
| 2      | 10.769        | VB   | 0.3788      | 5791.15186   | 229.94351    | 50.4146 |

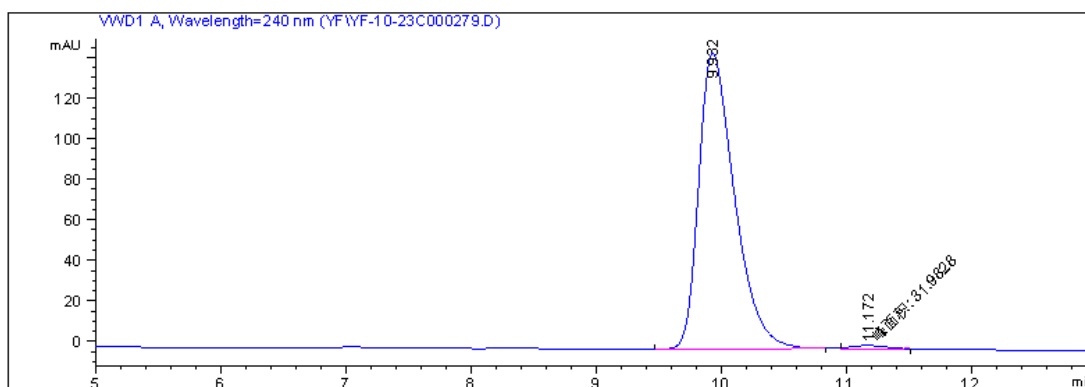

| Peak # | RetTime [min] | Type | Width [min] | Area [mAU*s] | Height [mAU] | Area %  |
|--------|---------------|------|-------------|--------------|--------------|---------|
| 1      | 9.932         | BB   | 0.3028      | 2893.77710   | 145.66599    | 98.9069 |
| 2      | 11.172        | MM   | 0.3191      | 31.98281     | 1.67054      | 1.0931  |

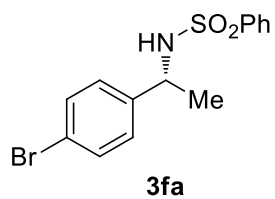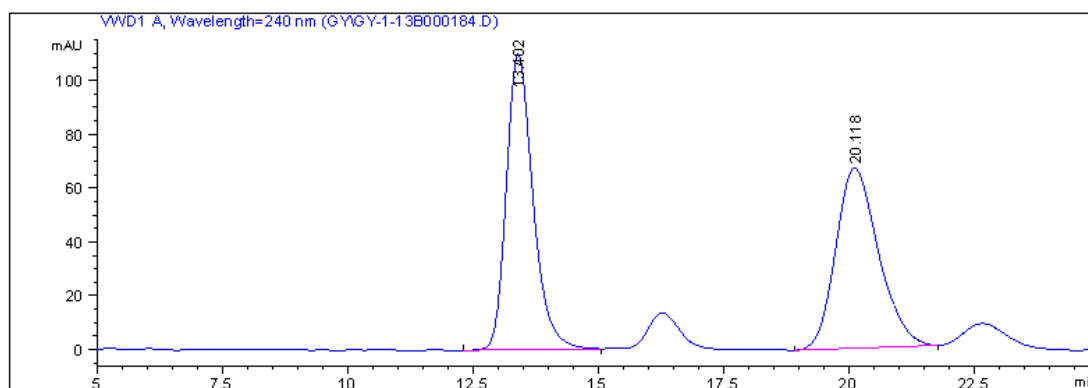

| Peak # | RetTime [min] | Type | Width [min] | Area [mAU*s] | Height [mAU] | Area %  |
|--------|---------------|------|-------------|--------------|--------------|---------|
| 1      | 13.402        | BB   | 0.5667      | 4072.95020   | 110.07288    | 50.6292 |
| 2      | 20.118        | BB   | 0.9098      | 3971.71948   | 66.98355     | 49.3708 |

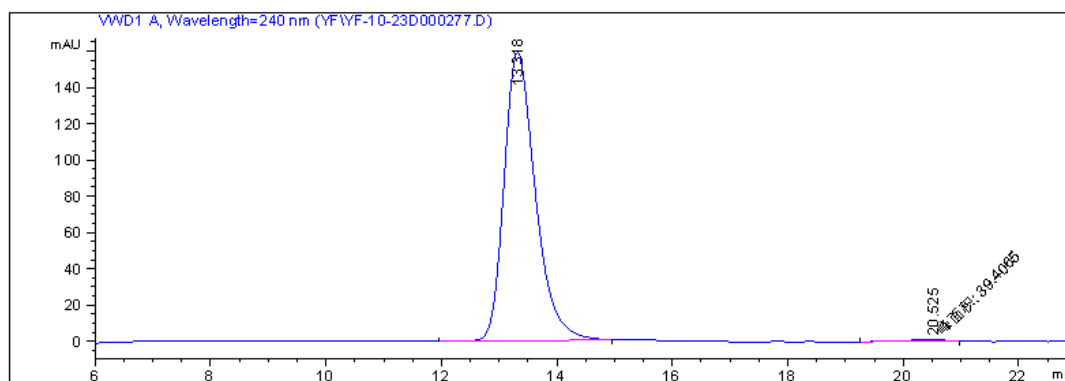

| Peak # | RetTime [min] | Type | Width [min] | Area [mAU*s] | Height [mAU] | Area %  |
|--------|---------------|------|-------------|--------------|--------------|---------|
| 1      | 13.318        | BB   | 0.5790      | 5990.16309   | 158.83418    | 99.3464 |
| 2      | 20.525        | MM   | 0.7126      | 39.40650     | 9.21684e-1   | 0.6536  |

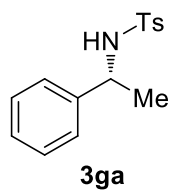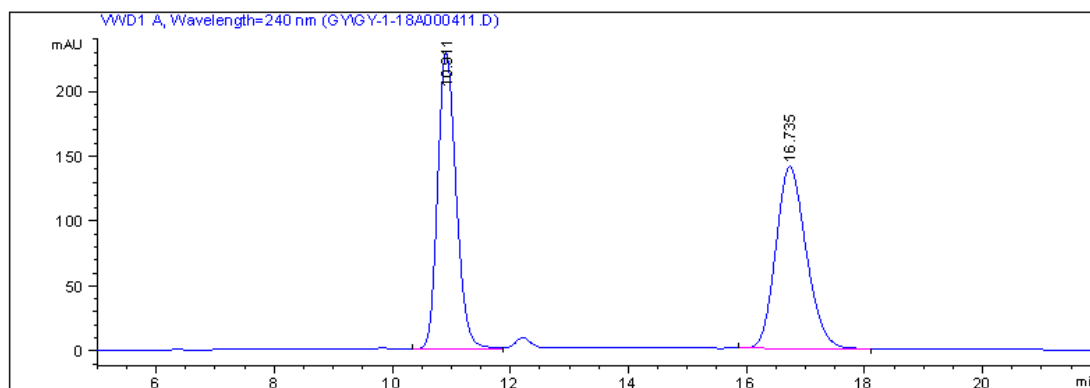

| Peak # | RetTime [min] | Type | Width [min] | Area [mAU*s] | Height [mAU] | Area %  |
|--------|---------------|------|-------------|--------------|--------------|---------|
| 1      | 10.911        | BV   | 0.3375      | 4954.62744   | 228.06793    | 49.7489 |
| 2      | 16.735        | BB   | 0.5481      | 5004.64063   | 140.33078    | 50.2511 |

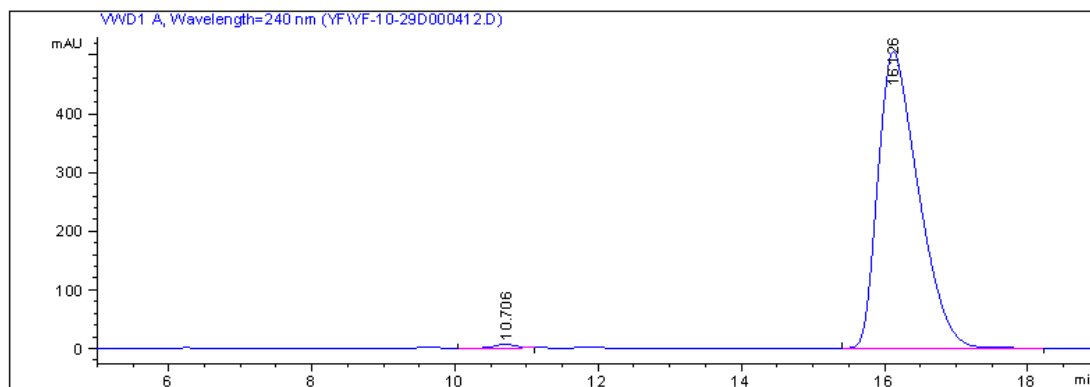

| Peak # | RetTime [min] | Type | Width [min] | Area [mAU*s] | Height [mAU] | Area %  |
|--------|---------------|------|-------------|--------------|--------------|---------|
| 1      | 10.706        | BB   | 0.3104      | 125.07738    | 6.30638      | 0.6286  |
| 2      | 16.126        | BB   | 0.6006      | 1.97736e4    | 505.24591    | 99.3714 |



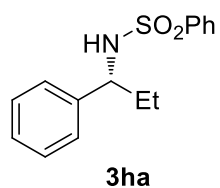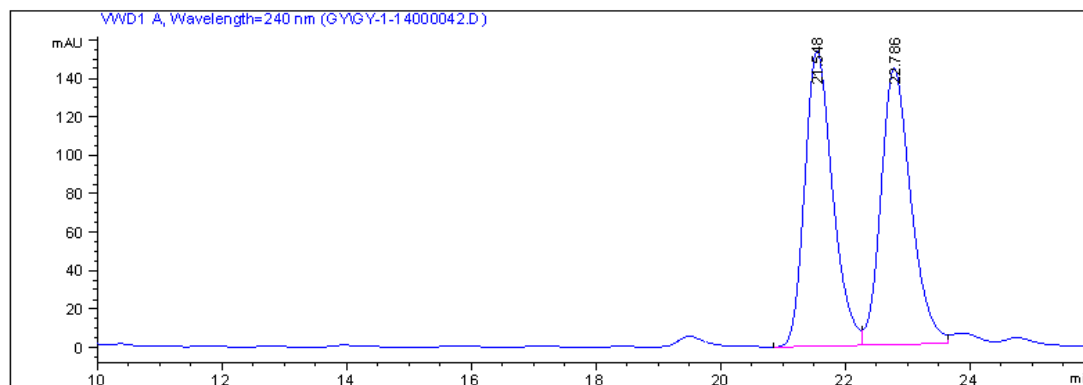

| Peak # | RetTime [min] | Type | Width [min] | Area [mAU*s] | Height [mAU] | Area %  |
|--------|---------------|------|-------------|--------------|--------------|---------|
| 1      | 21.548        | BV   | 0.4749      | 4770.20264   | 153.33679    | 49.7812 |
| 2      | 22.786        | VV   | 0.5088      | 4812.12842   | 143.67285    | 50.2188 |

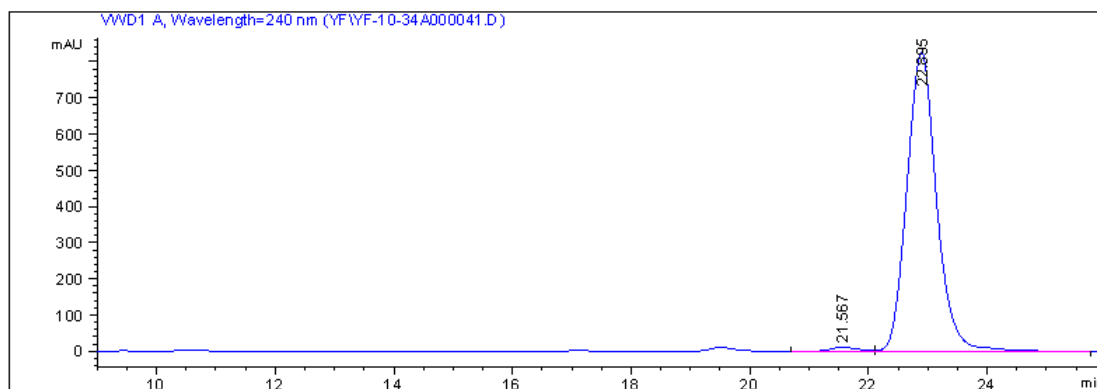

| Peak # | RetTime [min] | Type | Width [min] | Area [mAU*s] | Height [mAU] | Area %  |
|--------|---------------|------|-------------|--------------|--------------|---------|
| 1      | 21.567        | BV   | 0.4773      | 349.90408    | 11.14547     | 1.2056  |
| 2      | 22.895        | VB   | 0.5324      | 2.86729e4    | 825.13385    | 98.7944 |

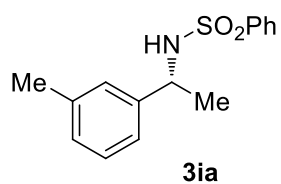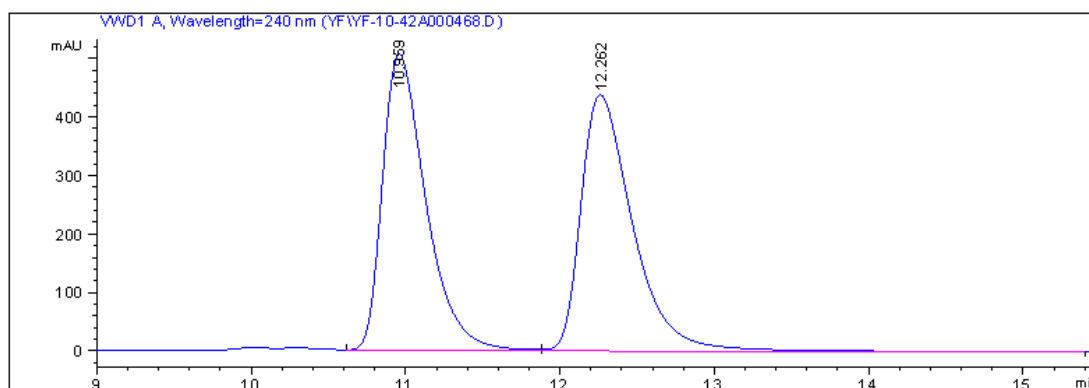

| Peak # | RetTime [min] | Type | Width [min] | Area [mAU*s] | Height [mAU] | Area %  |
|--------|---------------|------|-------------|--------------|--------------|---------|
| 1      | 10.959        | VV   | 0.2988      | 9949.96582   | 507.33347    | 49.4062 |
| 2      | 12.262        | VB   | 0.3536      | 1.01891e4    | 437.75040    | 50.5938 |

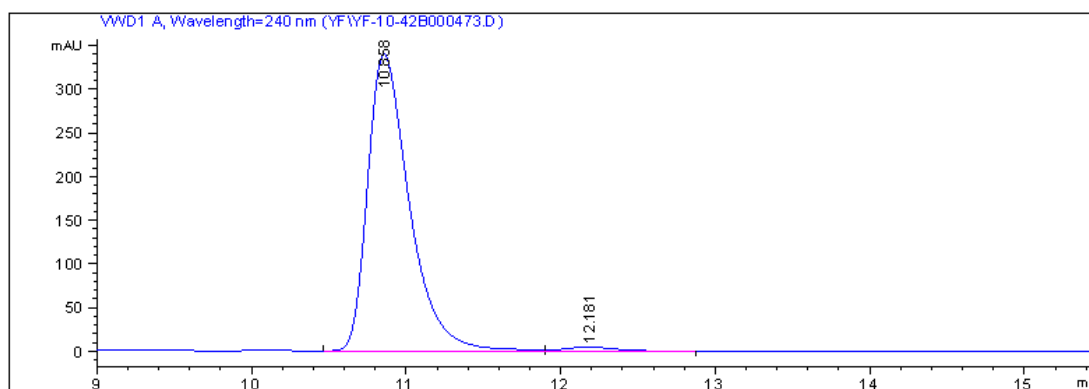

| Peak # | RetTime [min] | Type | Width [min] | Area [mAU*s] | Height [mAU] | Area %  |
|--------|---------------|------|-------------|--------------|--------------|---------|
| 1      | 10.858        | BV   | 0.2847      | 6378.53760   | 340.29050    | 98.4078 |
| 2      | 12.181        | VB   | 0.3266      | 103.20136    | 4.71044      | 1.5922  |

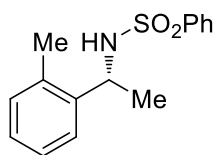**3ja**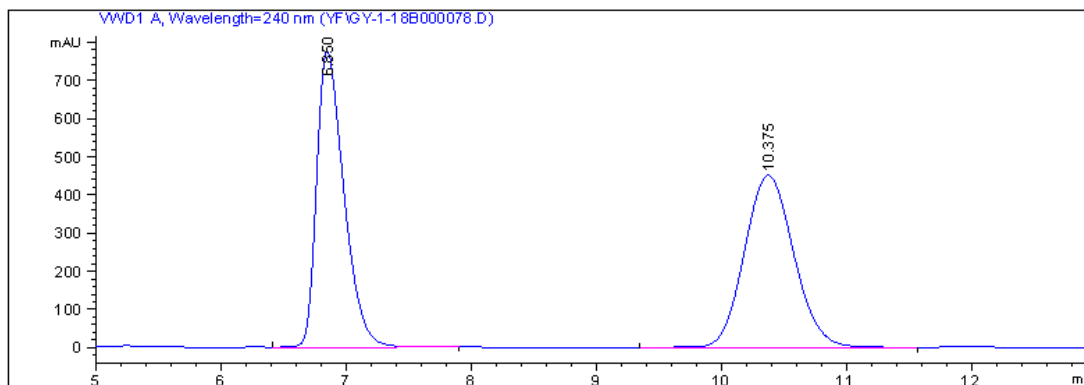

| Peak # | RetTime [min] | Type | Width [min] | Area [mAU*s] | Height [mAU] | Area %  |
|--------|---------------|------|-------------|--------------|--------------|---------|
| 1      | 6.850         | VB   | 0.2332      | 1.18089e4    | 777.28241    | 48.9398 |
| 2      | 10.375        | BB   | 0.4291      | 1.23206e4    | 450.41965    | 51.0602 |

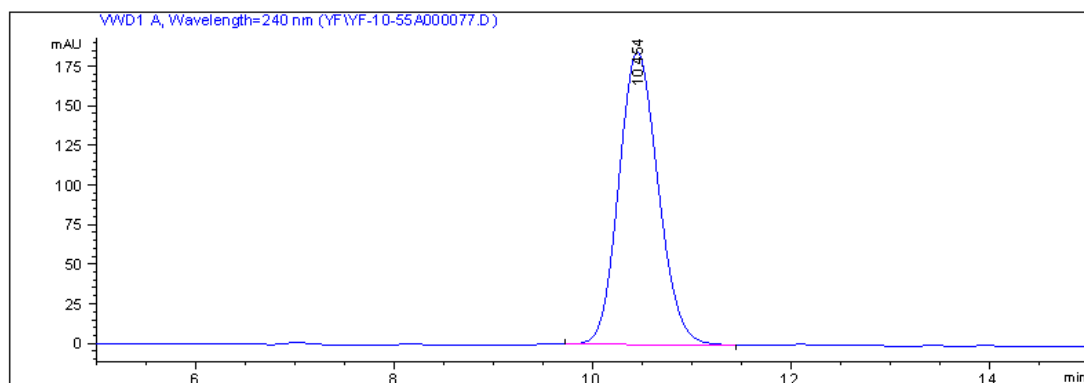

| Peak # | RetTime [min] | Type | Width [min] | Area [mAU*s] | Height [mAU] | Area %   |
|--------|---------------|------|-------------|--------------|--------------|----------|
| 1      | 10.454        | BB   | 0.4315      | 5101.67480   | 184.53714    | 100.0000 |

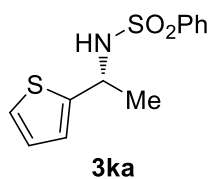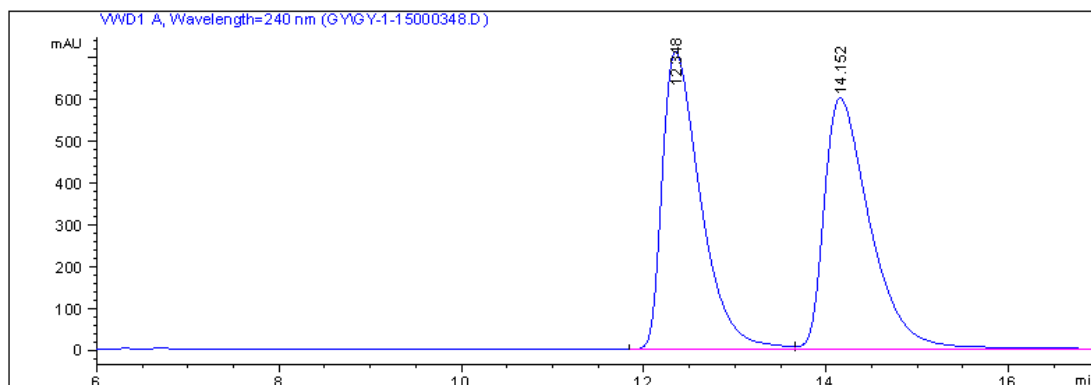

| Peak # | RetTime [min] | Type | Width [min] | Area [mAU*s] | Height [mAU] | Area %  |
|--------|---------------|------|-------------|--------------|--------------|---------|
| 1      | 12.348        | BV   | 0.4451      | 2.06360e4    | 709.90100    | 49.7537 |
| 2      | 14.152        | VBA  | 0.5277      | 2.08404e4    | 599.23828    | 50.2463 |

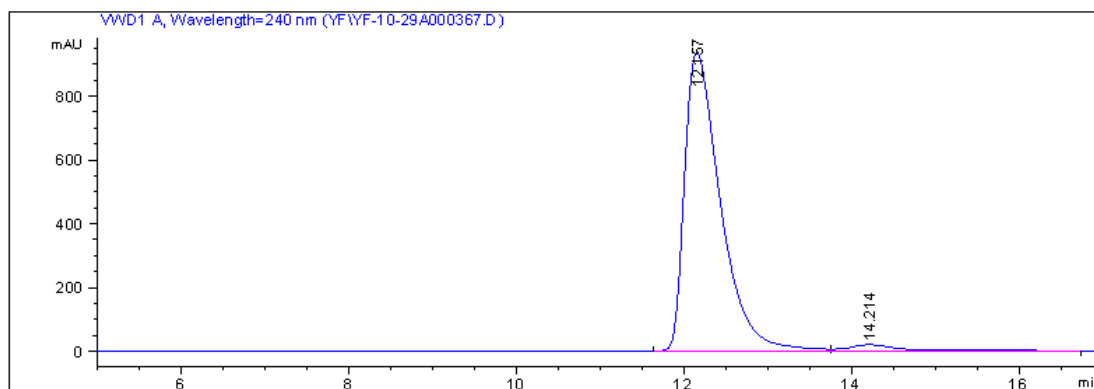

| Peak # | RetTime [min] | Type | Width [min] | Area [mAU*s] | Height [mAU] | Area %  |
|--------|---------------|------|-------------|--------------|--------------|---------|
| 1      | 12.157        | BV   | 0.4498      | 2.77262e4    | 935.51746    | 97.4590 |
| 2      | 14.214        | VB   | 0.5733      | 722.90405    | 18.36365     | 2.5410  |

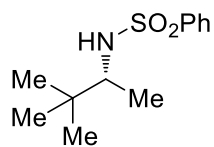

3a

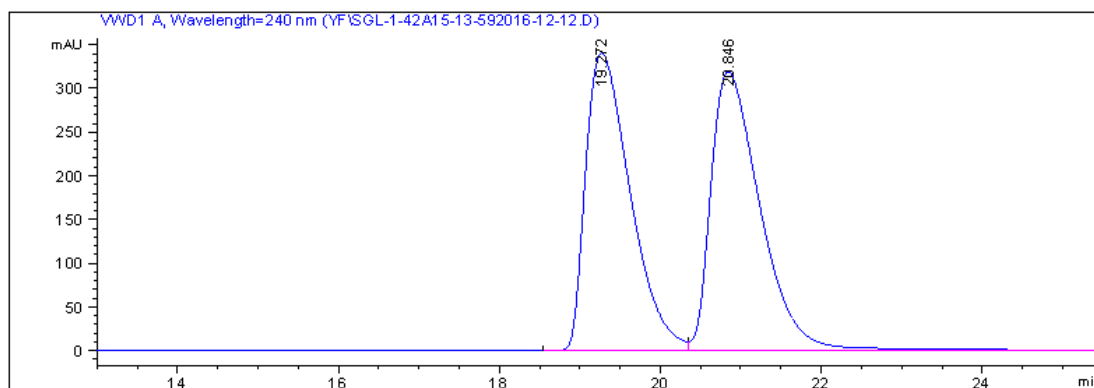

| Peak # | RetTime [min] | Type | Width [min] | Area [mAU*s] | Height [mAU] | Area %  |
|--------|---------------|------|-------------|--------------|--------------|---------|
| 1      | 19.272        | BV   | 0.6003      | 1.30183e4    | 340.28882    | 49.1391 |
| 2      | 20.846        | VBA  | 0.6505      | 1.34745e4    | 318.57135    | 50.8609 |

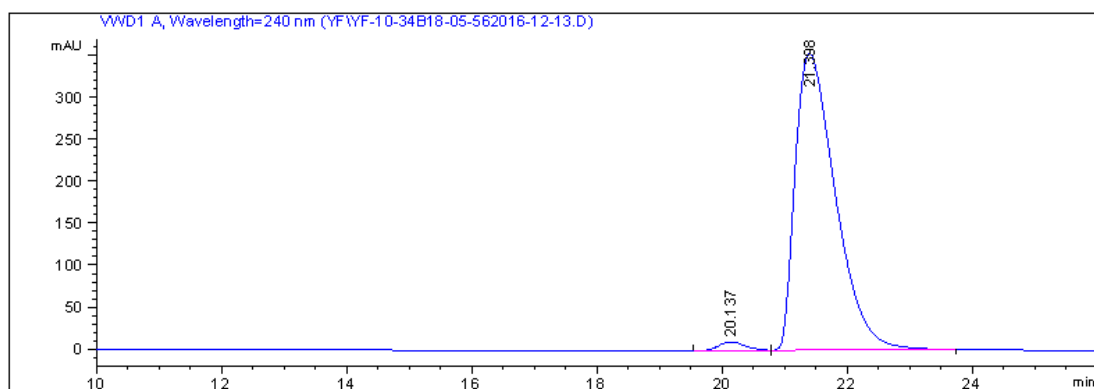

| Peak # | RetTime [min] | Type | Width [min] | Area [mAU*s] | Height [mAU] | Area %  |
|--------|---------------|------|-------------|--------------|--------------|---------|
| 1      | 20.137        | BV   | 0.4343      | 290.09961    | 10.34066     | 1.8081  |
| 2      | 21.398        | VB   | 0.6980      | 1.57540e4    | 352.79245    | 98.1919 |

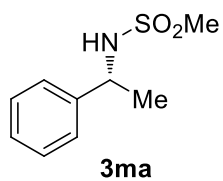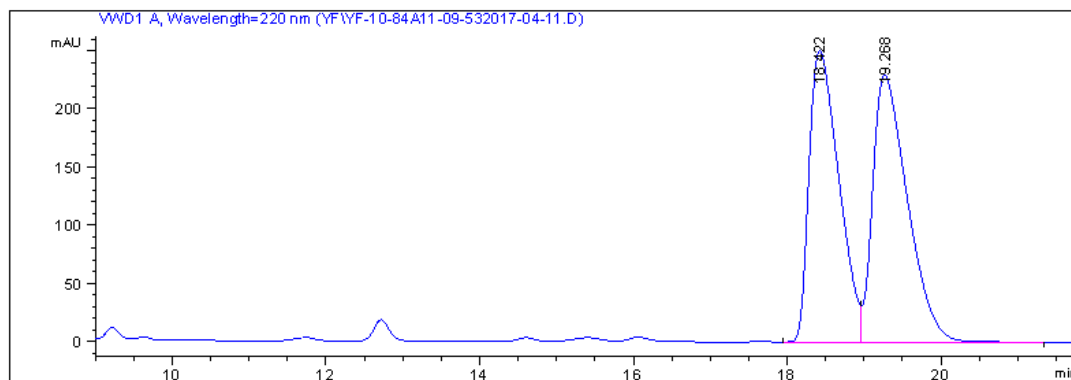

| # | [min]  |    | [min]  | [mAU*s]    | [mAU]     | %       |
|---|--------|----|--------|------------|-----------|---------|
| 1 | 18.422 | BV | 0.4242 | 6731.70996 | 250.73637 | 48.3197 |
| 2 | 19.268 | VB | 0.4817 | 7199.88379 | 229.68756 | 51.6803 |

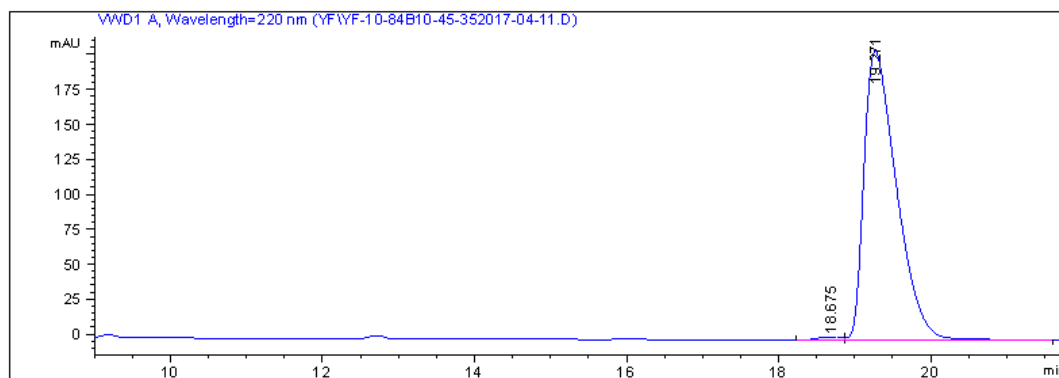

| # | [min]  |    | [min]  | [mAU*s]    | [mAU]     | %       |
|---|--------|----|--------|------------|-----------|---------|
| 1 | 18.675 | BV | 0.3042 | 40.95028   | 2.10282   | 0.6632  |
| 2 | 19.271 | VB | 0.4544 | 6133.78955 | 206.60033 | 99.3368 |

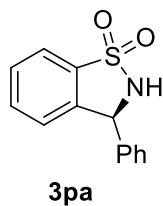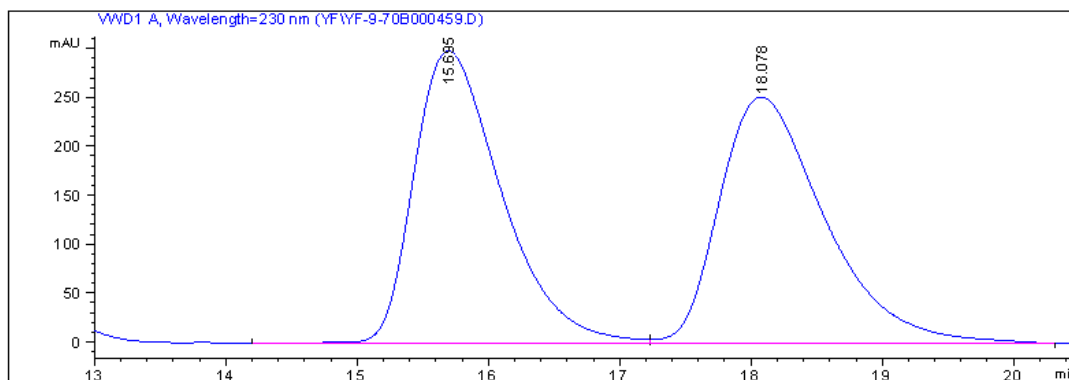

| Peak # | RetTime [min] | Type | Width [min] | Area [mAU*s] | Height [mAU] | Area %  |
|--------|---------------|------|-------------|--------------|--------------|---------|
| 1      | 15.695        | BV   | 0.7141      | 1.37966e4    | 298.54706    | 49.7327 |
| 2      | 18.078        | VB   | 0.8524      | 1.39450e4    | 251.29665    | 50.2673 |

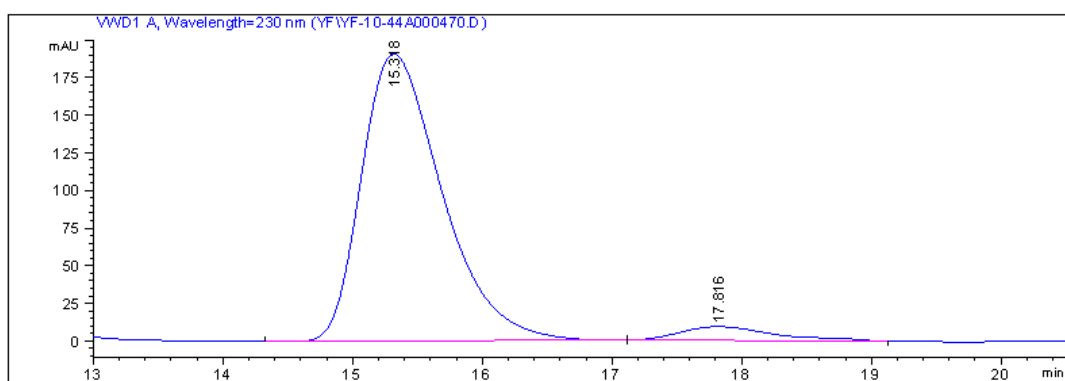

| Peak # | RetTime [min] | Type | Width [min] | Area [mAU*s] | Height [mAU] | Area %  |
|--------|---------------|------|-------------|--------------|--------------|---------|
| 1      | 15.318        | BB   | 0.6659      | 8215.36719   | 190.59251    | 94.7649 |
| 2      | 17.816        | BB   | 0.7735      | 453.83926    | 9.05881      | 5.2351  |

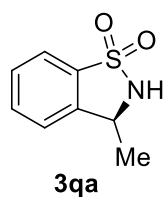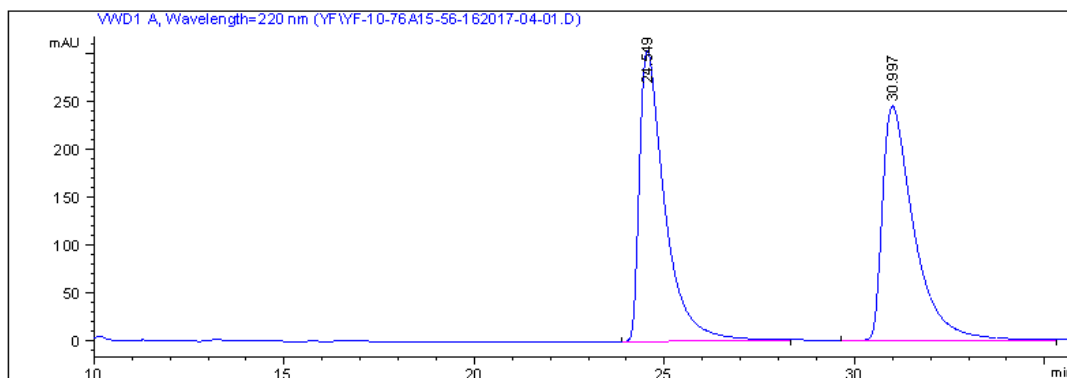

| Peak # | RetTime [min] | Type | Width [min] | Area [mAU*s] | Height [mAU] | Area %  |
|--------|---------------|------|-------------|--------------|--------------|---------|
| 1      | 24.549        | BB   | 0.6865      | 1.41048e4    | 303.89590    | 50.0131 |
| 2      | 30.997        | BB   | 0.8585      | 1.40974e4    | 244.93741    | 49.9869 |

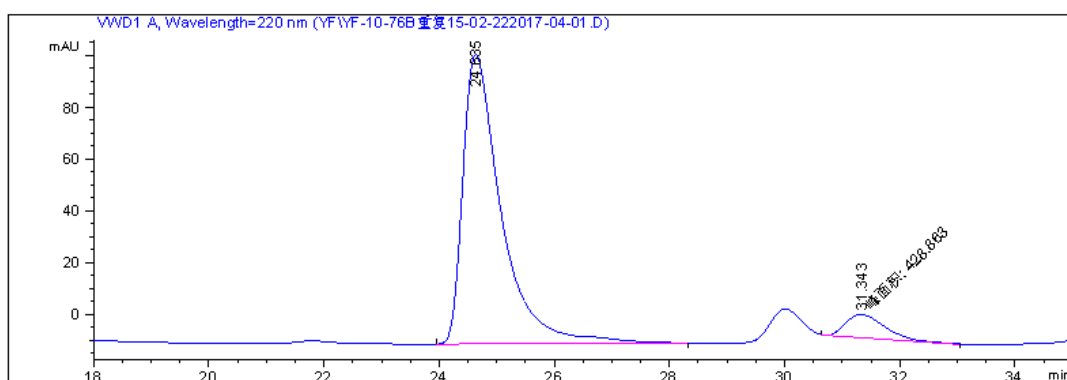

| Peak # | RetTime [min] | Type | Width [min] | Area [mAU*s] | Height [mAU] | Area %  |
|--------|---------------|------|-------------|--------------|--------------|---------|
| 1      | 24.635        | BB   | 0.6860      | 5185.42285   | 112.02570    | 92.3612 |
| 2      | 31.343        | MM   | 0.7962      | 428.86328    | 8.97720      | 7.6388  |



## F: X-Ray Crystallography of Compound 3aa

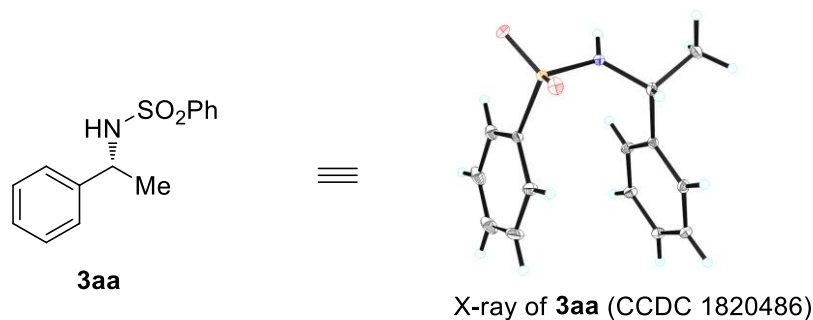

Crystal data for mo\_vyf961a\_0m: C<sub>14</sub>H<sub>15</sub>NO<sub>2</sub>S,  $M = 261.33$ ,  $a = 8.4454(12)$  Å,  $b = 7.2057(10)$  Å,  $c = 10.9962(16)$  Å,  $\alpha = 90^\circ$ ,  $\beta = 96.797(2)^\circ$ ,  $\gamma = 90^\circ$ ,  $V = 664.47(16)$  Å<sup>3</sup>,  $T = 100(2)$  K, space group  $P21$ ,  $Z = 2$ ,  $\mu(\text{MoK}\alpha) = 0.237$  mm<sup>-1</sup>, 7384 reflections measured, 3779 independent reflections ( $R_{int} = 0.0175$ ). The final  $R_I$  values were 0.0271 ( $I > 2\sigma(I)$ ). The final  $wR(F^2)$  values were 0.0710 ( $I > 2\sigma(I)$ ). The final  $R_I$  values were 0.0278 (all data). The final  $wR(F^2)$  values were 0.0714 (all data). The goodness of fit on  $F^2$  was 1.077. Flack parameter = 0.029(19).

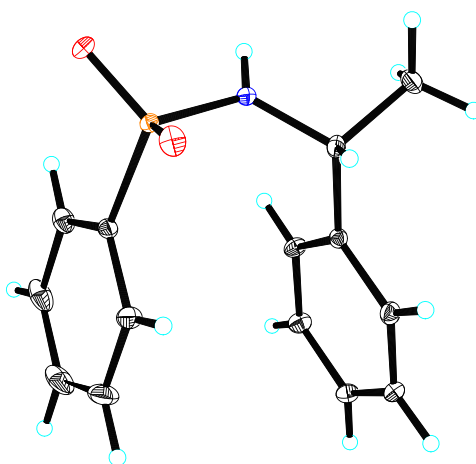

View of a molecule of vyf961a with the atom-labelling scheme.

Displacement ellipsoids are drawn at the 30% probability level.

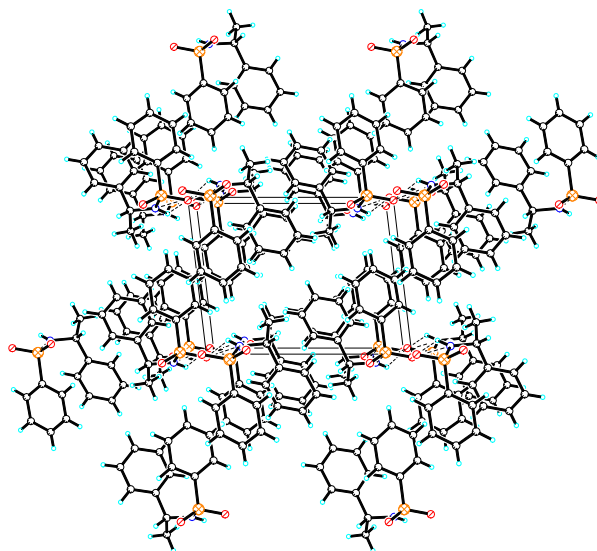

View of the pack drawing of vyf961a.

Hydrogen-bonds are shown as dashed lines.

Table 1. Crystal data and structure refinement for mo\_vyf961a\_0m.

|                                  |                                                    |                 |
|----------------------------------|----------------------------------------------------|-----------------|
| Identification code              | mo_vyf961a_0m                                      |                 |
| Empirical formula                | C <sub>14</sub> H <sub>15</sub> N O <sub>2</sub> S |                 |
| Formula weight                   | 261.33                                             |                 |
| Temperature                      | 100(2) K                                           |                 |
| Wavelength                       | 0.71073 Å                                          |                 |
| Crystal system                   | Monoclinic                                         |                 |
| Space group                      | P2 <sub>1</sub>                                    |                 |
| Unit cell dimensions             | a = 8.4454(12) Å                                   | α = 90 °        |
|                                  | b = 7.2057(10) Å                                   | β = 96.797(2) ° |
|                                  | c = 10.9962(16) Å                                  | γ = 90 °        |
| Volume                           | 664.47(16) Å <sup>3</sup>                          |                 |
| Z                                | 2                                                  |                 |
| Density (calculated)             | 1.306 Mg/m <sup>3</sup>                            |                 |
| Absorption coefficient           | 0.237 mm <sup>-1</sup>                             |                 |
| F(000)                           | 276                                                |                 |
| Crystal size                     | 1.200 x 0.270 x 0.250 mm <sup>3</sup>              |                 |
| Theta range for data collection  | 1.865 to 30.885 °                                  |                 |
| Index ranges                     | -12 ≤ h ≤ 12, -10 ≤ k ≤ 10, -15 ≤ l ≤ 15           |                 |
| Reflections collected            | 7384                                               |                 |
| Independent reflections          | 3779 [R(int) = 0.0175]                             |                 |
| Completeness to theta = 25.242 ° | 99.8 %                                             |                 |

|                                   |                                             |
|-----------------------------------|---------------------------------------------|
| Absorption correction             | Semi-empirical from equivalents             |
| Refinement method                 | Full-matrix least-squares on F <sup>2</sup> |
| Data / restraints / parameters    | 3779 / 1 / 164                              |
| Goodness-of-fit on F <sup>2</sup> | 1.077                                       |
| Final R indices [I>2sigma(I)]     | R1 = 0.0271, wR2 = 0.0710                   |
| R indices (all data)              | R1 = 0.0278, wR2 = 0.0714                   |
| Absolute structure parameter      | 0.029(19)                                   |
| Extinction coefficient            | n/a                                         |
| Largest diff. peak and hole       | 0.386 and -0.398 e.Å <sup>-3</sup>          |

Table 2. Atomic coordinates ( $\times 10^4$ ) and equivalent isotropic displacement parameters ( $\text{\AA}^2 \times 10^3$ ) for mo\_vyf961a\_0m. U(eq) is defined as one third of the trace of the orthogonalized  $U^{ij}$  tensor.

|       | x        | y        | z       | U(eq) |
|-------|----------|----------|---------|-------|
| S(1)  | 114(1)   | 10025(1) | 8729(1) | 13(1) |
| O(1)  | -192(1)  | 10136(2) | 9991(1) | 21(1) |
| O(2)  | -509(2)  | 11425(2) | 7876(1) | 21(1) |
| N(1)  | -628(2)  | 8050(2)  | 8253(1) | 14(1) |
| C(1)  | 5425(2)  | 9508(3)  | 8624(3) | 37(1) |
| C(2)  | 4751(2)  | 8856(3)  | 9639(2) | 31(1) |
| C(3)  | 3126(2)  | 9052(3)  | 9690(2) | 22(1) |
| C(4)  | 2198(2)  | 9922(3)  | 8720(1) | 15(1) |
| C(5)  | -769(2)  | 7504(2)  | 6953(1) | 16(1) |
| C(6)  | 780(2)   | 6841(2)  | 6516(1) | 14(1) |
| C(7)  | 1908(2)  | 5814(2)  | 7268(1) | 17(1) |
| C(8)  | 3305(2)  | 5220(3)  | 6838(2) | 20(1) |
| C(9)  | 3579(2)  | 5606(3)  | 5638(2) | 20(1) |
| C(10) | 2452(2)  | 6599(3)  | 4878(2) | 20(1) |
| C(11) | 1068(2)  | 7226(2)  | 5319(1) | 17(1) |
| C(12) | -2055(2) | 5999(3)  | 6766(2) | 26(1) |
| C(13) | 2861(2)  | 10593(3) | 7705(2) | 23(1) |
| C(14) | 4487(2)  | 10368(3) | 7666(2) | 34(1) |

Table 3. Bond lengths [ $\text{\AA}$ ] and angles [ $^\circ$ ] for mo\_vyf961a\_0m.

---

|                |            |
|----------------|------------|
| S(1)-O(2)      | 1.4339(13) |
| S(1)-O(1)      | 1.4435(12) |
| S(1)-N(1)      | 1.6166(14) |
| S(1)-C(4)      | 1.7632(14) |
| N(1)-C(5)      | 1.474(2)   |
| N(1)-H(4)      | 0.8800     |
| C(1)-C(14)     | 1.388(4)   |
| C(1)-C(2)      | 1.393(4)   |
| C(1)-H(1)      | 0.9500     |
| C(2)-C(3)      | 1.387(3)   |
| C(2)-H(15)     | 0.9500     |
| C(3)-C(4)      | 1.395(2)   |
| C(3)-H(3)      | 0.9500     |
| C(4)-C(13)     | 1.393(2)   |
| C(5)-C(6)      | 1.523(2)   |
| C(5)-C(12)     | 1.531(2)   |
| C(5)-H(5)      | 1.0000     |
| C(6)-C(11)     | 1.395(2)   |
| C(6)-C(7)      | 1.397(2)   |
| C(7)-C(8)      | 1.389(2)   |
| C(7)-H(9)      | 0.9500     |
| C(8)-C(9)      | 1.395(2)   |
| C(8)-H(8)      | 0.9500     |
| C(9)-C(10)     | 1.388(2)   |
| C(9)-H(2)      | 0.9500     |
| C(10)-C(11)    | 1.392(2)   |
| C(10)-H(6)     | 0.9500     |
| C(11)-H(7)     | 0.9500     |
| C(12)-H(12)    | 0.9800     |
| C(12)-H(11)    | 0.9800     |
| C(12)-H(10)    | 0.9800     |
| C(13)-C(14)    | 1.388(3)   |
| C(13)-H(14)    | 0.9500     |
| C(14)-H(13)    | 0.9500     |
| O(2)-S(1)-O(1) | 119.74(8)  |
| O(2)-S(1)-N(1) | 108.06(8)  |

---

|                  |            |
|------------------|------------|
| O(1)-S(1)-N(1)   | 104.65(8)  |
| O(2)-S(1)-C(4)   | 108.39(8)  |
| O(1)-S(1)-C(4)   | 107.46(7)  |
| N(1)-S(1)-C(4)   | 108.04(8)  |
| C(5)-N(1)-S(1)   | 122.17(12) |
| C(5)-N(1)-H(4)   | 118.9      |
| S(1)-N(1)-H(4)   | 118.9      |
| C(14)-C(1)-C(2)  | 120.54(18) |
| C(14)-C(1)-H(1)  | 119.7      |
| C(2)-C(1)-H(1)   | 119.7      |
| C(3)-C(2)-C(1)   | 119.89(19) |
| C(3)-C(2)-H(15)  | 120.1      |
| C(1)-C(2)-H(15)  | 120.1      |
| C(2)-C(3)-C(4)   | 118.91(18) |
| C(2)-C(3)-H(3)   | 120.5      |
| C(4)-C(3)-H(3)   | 120.5      |
| C(13)-C(4)-C(3)  | 121.73(15) |
| C(13)-C(4)-S(1)  | 119.07(12) |
| C(3)-C(4)-S(1)   | 119.04(12) |
| N(1)-C(5)-C(6)   | 114.55(12) |
| N(1)-C(5)-C(12)  | 107.08(14) |
| C(6)-C(5)-C(12)  | 110.95(14) |
| N(1)-C(5)-H(5)   | 108.0      |
| C(6)-C(5)-H(5)   | 108.0      |
| C(12)-C(5)-H(5)  | 108.0      |
| C(11)-C(6)-C(7)  | 118.77(14) |
| C(11)-C(6)-C(5)  | 119.14(14) |
| C(7)-C(6)-C(5)   | 122.06(14) |
| C(8)-C(7)-C(6)   | 120.55(15) |
| C(8)-C(7)-H(9)   | 119.7      |
| C(6)-C(7)-H(9)   | 119.7      |
| C(7)-C(8)-C(9)   | 120.25(15) |
| C(7)-C(8)-H(8)   | 119.9      |
| C(9)-C(8)-H(8)   | 119.9      |
| C(10)-C(9)-C(8)  | 119.56(15) |
| C(10)-C(9)-H(2)  | 120.2      |
| C(8)-C(9)-H(2)   | 120.2      |
| C(9)-C(10)-C(11) | 120.11(15) |

|                   |            |
|-------------------|------------|
| C(9)-C(10)-H(6)   | 119.9      |
| C(11)-C(10)-H(6)  | 119.9      |
| C(10)-C(11)-C(6)  | 120.74(15) |
| C(10)-C(11)-H(7)  | 119.6      |
| C(6)-C(11)-H(7)   | 119.6      |
| C(5)-C(12)-H(12)  | 109.5      |
| C(5)-C(12)-H(11)  | 109.5      |
| H(12)-C(12)-H(11) | 109.5      |
| C(5)-C(12)-H(10)  | 109.5      |
| H(12)-C(12)-H(10) | 109.5      |
| H(11)-C(12)-H(10) | 109.5      |
| C(14)-C(13)-C(4)  | 118.51(18) |
| C(14)-C(13)-H(14) | 120.7      |
| C(4)-C(13)-H(14)  | 120.7      |
| C(1)-C(14)-C(13)  | 120.42(19) |
| C(1)-C(14)-H(13)  | 119.8      |
| C(13)-C(14)-H(13) | 119.8      |

Symmetry transformations used to generate equivalent atoms:

Table 4. Anisotropic displacement parameters ( $\text{\AA}^2 \times 10^3$ ) for mo\_vyf961a\_0m. The anisotropic displacement factor exponent takes the form:  $-2\pi^2 [ h^2 a^{*2} U^{11} + \dots + 2 h k a^* b^* U^{12} ]$

|      | $U^{11}$ | $U^{22}$ | $U^{33}$ | $U^{23}$ | $U^{13}$ | $U^{12}$ |
|------|----------|----------|----------|----------|----------|----------|
| S(1) | 12(1)    | 14(1)    | 13(1)    | -2(1)    | 2(1)     | 1(1)     |
| O(1) | 22(1)    | 25(1)    | 16(1)    | -7(1)    | 7(1)     | -1(1)    |
| O(2) | 21(1)    | 16(1)    | 24(1)    | 1(1)     | -2(1)    | 3(1)     |
| N(1) | 14(1)    | 15(1)    | 14(1)    | -1(1)    | 3(1)     | -2(1)    |
| C(1) | 15(1)    | 31(1)    | 65(2)    | -17(1)   | 9(1)     | -2(1)    |
| C(2) | 17(1)    | 25(1)    | 49(1)    | -8(1)    | -7(1)    | 2(1)     |
| C(3) | 18(1)    | 20(1)    | 26(1)    | -2(1)    | -2(1)    | 1(1)     |
| C(4) | 12(1)    | 15(1)    | 18(1)    | -4(1)    | 3(1)     | 0(1)     |
| C(5) | 16(1)    | 17(1)    | 13(1)    | -3(1)    | -1(1)    | 2(1)     |
| C(6) | 15(1)    | 12(1)    | 14(1)    | -1(1)    | 1(1)     | -1(1)    |
| C(7) | 19(1)    | 19(1)    | 15(1)    | 3(1)     | 4(1)     | 3(1)     |
| C(8) | 18(1)    | 21(1)    | 20(1)    | 2(1)     | 4(1)     | 5(1)     |
| C(9) | 17(1)    | 25(1)    | 20(1)    | -2(1)    | 7(1)     | 0(1)     |

|       |       |       |       |        |       |        |
|-------|-------|-------|-------|--------|-------|--------|
| C(10) | 21(1) | 25(1) | 14(1) | -1(1)  | 4(1)  | -4(1)  |
| C(11) | 19(1) | 19(1) | 14(1) | 1(1)   | -1(1) | -1(1)  |
| C(12) | 16(1) | 30(1) | 32(1) | -14(1) | 4(1)  | -5(1)  |
| C(13) | 24(1) | 23(1) | 23(1) | -2(1)  | 9(1)  | -5(1)  |
| C(14) | 27(1) | 35(1) | 45(1) | -10(1) | 22(1) | -10(1) |

Table 5. Hydrogen coordinates ( $\times 10^4$ ) and isotropic displacement parameters ( $\text{\AA}^2 \times 10^3$ ) for mo\_vyf961a\_0m.

|       | x     | y     | z     | U(eq) |
|-------|-------|-------|-------|-------|
| H(4)  | -958  | 7276  | 8788  | 17    |
| H(1)  | 6536  | 9362  | 8587  | 44    |
| H(15) | 5403  | 8279  | 10295 | 38    |
| H(3)  | 2652  | 8600  | 10374 | 26    |
| H(5)  | -1153 | 8606  | 6449  | 19    |
| H(9)  | 1718  | 5518  | 8080  | 21    |
| H(8)  | 4076  | 4550  | 7364  | 23    |
| H(2)  | 4530  | 5191  | 5342  | 24    |
| H(6)  | 2626  | 6852  | 4056  | 24    |
| H(7)  | 312   | 7924  | 4798  | 21    |
| H(12) | -1703 | 4903  | 7252  | 39    |
| H(11) | -2236 | 5660  | 5898  | 39    |
| H(10) | -3049 | 6470  | 7029  | 39    |
| H(14) | 2215  | 11191 | 7055  | 28    |
| H(13) | 4960  | 10807 | 6978  | 41    |

Table 6. Torsion angles [ $^\circ$ ] for mo\_vyf961a\_0m.

|                      |            |
|----------------------|------------|
| O(2)-S(1)-N(1)-C(5)  | 42.60(14)  |
| O(1)-S(1)-N(1)-C(5)  | 171.24(12) |
| C(4)-S(1)-N(1)-C(5)  | -74.47(13) |
| C(14)-C(1)-C(2)-C(3) | 0.6(3)     |
| C(1)-C(2)-C(3)-C(4)  | -0.7(3)    |
| C(2)-C(3)-C(4)-C(13) | 0.1(3)     |

|                       |             |
|-----------------------|-------------|
| C(2)-C(3)-C(4)-S(1)   | 175.51(15)  |
| O(2)-S(1)-C(4)-C(13)  | -21.82(18)  |
| O(1)-S(1)-C(4)-C(13)  | -152.55(15) |
| N(1)-S(1)-C(4)-C(13)  | 95.04(16)   |
| O(2)-S(1)-C(4)-C(3)   | 162.69(14)  |
| O(1)-S(1)-C(4)-C(3)   | 31.96(17)   |
| N(1)-S(1)-C(4)-C(3)   | -80.46(15)  |
| S(1)-N(1)-C(5)-C(6)   | 78.20(16)   |
| S(1)-N(1)-C(5)-C(12)  | -158.32(12) |
| N(1)-C(5)-C(6)-C(11)  | -145.80(15) |
| C(12)-C(5)-C(6)-C(11) | 92.83(18)   |
| N(1)-C(5)-C(6)-C(7)   | 35.9(2)     |
| C(12)-C(5)-C(6)-C(7)  | -85.43(19)  |
| C(11)-C(6)-C(7)-C(8)  | 1.3(3)      |
| C(5)-C(6)-C(7)-C(8)   | 179.59(16)  |
| C(6)-C(7)-C(8)-C(9)   | -1.6(3)     |
| C(7)-C(8)-C(9)-C(10)  | 0.5(3)      |
| C(8)-C(9)-C(10)-C(11) | 0.8(3)      |
| C(9)-C(10)-C(11)-C(6) | -1.1(3)     |
| C(7)-C(6)-C(11)-C(10) | 0.0(2)      |
| C(5)-C(6)-C(11)-C(10) | -178.30(15) |
| C(3)-C(4)-C(13)-C(14) | 0.5(3)      |
| S(1)-C(4)-C(13)-C(14) | -174.89(15) |
| C(2)-C(1)-C(14)-C(13) | 0.0(3)      |
| C(4)-C(13)-C(14)-C(1) | -0.6(3)     |

Symmetry transformations used to generate equivalent atoms:

Table 7. Hydrogen bonds for mo\_vyf961a\_0m [ $\text{\AA}$  and  $^\circ$ ].

| D-H...A            | d(D-H) | d(H...A) | d(D...A) | $\angle(\text{DHA})$ |
|--------------------|--------|----------|----------|----------------------|
| N(1)-H(4)...O(1)#1 | 0.88   | 2.19     | 2.882(2) | 134.6                |
| N(1)-H(4)...O(1)#1 | 0.88   | 2.19     | 2.882(2) | 134.6                |
| N(1)-H(4)...O(1)#1 | 0.88   | 2.19     | 2.882(2) | 134.6                |
| N(1)-H(4)...O(1)#1 | 0.88   | 2.19     | 2.882(2) | 134.6                |
| N(1)-H(4)...O(1)#1 | 0.88   | 2.19     | 2.882(2) | 134.6                |
| N(1)-H(4)...O(1)#1 | 0.88   | 2.19     | 2.882(2) | 134.6                |



---

|                    |      |      |          |       |
|--------------------|------|------|----------|-------|
| N(1)-H(4)...O(1)#1 | 0.88 | 2.19 | 2.882(2) | 134.6 |
| N(1)-H(4)...O(1)#1 | 0.88 | 2.19 | 2.882(2) | 134.6 |

---

Symmetry transformations used to generate equivalent atoms:

#1  $-x, y-1/2, -z+2$
